## 1 **Metabolite Damage and Damage-Control in a Minimal Genome**

2

3 Drago Haas<sup>1&</sup>, Antje M. Thamm<sup>2%</sup>, Jiayi Sun<sup>2§</sup>, Lili Huang<sup>3#</sup>, Lijie Sun<sup>4</sup>, Guillaume A.W.  
4 Beaudoin<sup>2†</sup>, Kim S. Wise<sup>4</sup>, Claudia Lerma-Ortiz<sup>2</sup>, Steven D. Bruner<sup>5</sup>, Marian Breuer<sup>6</sup>, Zaida  
5 Luthey-Schulten<sup>7</sup>, Jiusheng Lin<sup>8</sup>, Mark A. Wilson<sup>8</sup>, Greg Brown<sup>9</sup>, Alexander F. Yakunin<sup>9</sup>, Inna  
6 Kurilyak<sup>10</sup>, Jacob Folz<sup>10</sup>, Oliver Fiehn<sup>10</sup>, John I. Glass<sup>4</sup>, Andrew D. Hanson<sup>2</sup>, Christopher S.  
7 Henry<sup>11,12\*</sup> and Valérie de Crécy-Lagard<sup>1,13\*</sup>

8

9 <sup>1</sup> Department of Microbiology and Cell Science, University of Florida, Gainesville, FL 32611,  
10 USA

11 <sup>2</sup> Horticultural Sciences Department, University of Florida, Gainesville, FL 3261, USA

12 <sup>3</sup> Food Science and Human Nutrition Department, University of Florida, Gainesville, FL 32611,  
13 USA

14 <sup>4</sup> J. Craig Venter Institute, La Jolla, CA 92037, USA

15 <sup>5</sup> Chemistry Department, University of Florida, Gainesville, FL 32611, USA

16 <sup>6</sup> Maastricht Centre for Systems Biology (MaCSBio), Maastricht University, 6200 MD  
17 Maastricht, The Netherlands

18 <sup>7</sup> Department of Chemistry, University of Illinois at Urbana-Champaign, Urbana, IL 61801, USA

19 <sup>8</sup> Department of Biochemistry and the Redox Biology Center, University of Nebraska, Lincoln,  
20 NE 68588, USA

21 <sup>9</sup> Department of Chemical Engineering and Applied Chemistry, University of Toronto, Toronto,  
22 ON M5S 3E5, Canada; Centre for Environmental Biotechnology, School of Natural Sciences,  
23 Bangor University, Bangor, LL57 2UW, UK

24 <sup>10</sup> West Coast Metabolomics Center, UC Davis, Davis, CA 95616, USA

25 <sup>11</sup> Data Science and Learning, Argonne National Laboratory, Argonne, IL 60439, USA

26 <sup>12</sup> Consortium for Advanced Science and Engineering, The University of Chicago, Chicago, IL  
27 60637, USA

28 <sup>13</sup> University of Florida Genetics Institute, Gainesville, FL 32611, USA<sup>11</sup>

29 <sup>&</sup> Current address – Sanofi, 13 Quai Jules Guesde Vitry-sur-Seine 94400, France

30 <sup>%</sup> Current address – Havas Life Bird and Schulte, Urachstrasse 19, 79102 Freiburg im Breisgau,  
31 Germany

32 § Current address – Captozyme, 1622 NW 55th Place, Gainesville, FL 32653, USA

33 # Current address – Lingnan Medical Research Center, Guangzhou University of Chinese

34 Medicine, Guangzhou, Guangdong, China, 510006

35 † Current address –Ginkgo Bioworks, 27 Drydock Ave 8th Floor, Boston, MA 02210

36

37

38

39 \* Corresponding Authors: Valérie de Crécy-Lagard [vcrecy@ufl.edu](mailto:vcrecy@ufl.edu) and Christopher S. Henry

40 [chenry@anl.gov](mailto:chenry@anl.gov)

41

42 Target Journal : *MBIO AAM fellow submission route*

43 <https://journals.asm.org/journal/mbio/fellows>

44 Possible reviewers Carole Linster Vadim Gladyshev

45 Zoran Nikoloski [https://www.mpimp-golm.mpg.de/13193/Zoran\\_Nikoloski](https://www.mpimp-golm.mpg.de/13193/Zoran_Nikoloski)

46 Pedro Mendes <http://www.comp-sys-bio.org/pedro/Mendes.html>

47 Paco Baroma-Gomez <https://langebio.cinvestav.mx/en/Dr-Francisco-Barona>

48

49

## 50 **Abstract**

51 Analysis of the genes retained in the minimized Mycoplasma JCVI-Syn3A genome established  
52 that systems that repair or preempt metabolite damage are essential to life. Several genes with  
53 known metabolite damage repair or preemption functions were identified and experimentally  
54 validated, including 5-formyltetrahydrofolate cyclo-ligase, CoA disulfide reductase, and certain  
55 hydrolases. Furthermore, we discovered that an enigmatic YqeK hydrolase domain fused to  
56 NadD has a novel proofreading function in NAD synthesis and could double as a MutT-like  
57 sanitizing enzyme for the nucleotide pool. Finally, we combined metabolomics and  
58 cheminformatics approaches to extend the core metabolic map of JCVI-Syn3A to include  
59 promiscuous enzymatic reactions and spontaneous side reactions. This extension revealed that  
60 several key metabolite damage-control systems remain to be identified in JCVI-Syn3A, such as  
61 that for methylglyoxal.

## 62 **Introduction**

63 A foundational goal of synthetic biology was to create a minimal living organism by a  
64 bottom-up approach (1). This goal was reached in 2016 with the creation of JCVI-Syn3.0 (2).  
65 This organism, based on the blueprint of the ruminant pathogen *Mycoplasma mycoides capri*  
66 serovar LC GM12, a Gram-positive bacterium, was built by combining DNA synthesis,  
67 recombination, and genome transplantation techniques, and was designed to include only genes  
68 that are required for survival or to support a reasonable growth rate (428 protein-coding genes  
69 and 34 genes for RNAs) (2). The initial strain JCVI-Syn3.0 was extremely fragile and another  
70 derivative with an additional 18 genes, JCVI-Syn3A was found to be more stable and was the  
71 basis for the recently published metabolic model (3). Surprisingly, at the time of publication in  
72 2016, ~30 % of the genes in JCVI-Syn3.0 could not be assigned a specific function. The initial  
73 annotation has since been improved by manual curation (4), through the creation of a detailed  
74 metabolic model (3) and through further in silico analyses (5) but ~85 proteins with unknown or  
75 just broadly defined function remain (Supplemental data S1). These unknowns cannot all be  
76 missing parts of synthesis/breakdown pathways as the metabolic reconstruction only identified a  
77 few such gaps, namely four metabolic and eight transport reactions (3).

78 A crucial area of metabolism that is left out of classical metabolic models is metabolite  
79 damage and repair. Enzymes make mistakes and metabolites can undergo spontaneous chemical  
80 reactions (for classical examples see reference (6)). These types of uncontrolled metabolite  
81 damage are ever-present and, when the resulting side-products have toxic effects, their  
82 accumulation can impose a fitness cost (6, 7). In recent years, it has been shown that many  
83 enzymes of formerly unknown function repair or pre-empt metabolite damage (8), that human  
84 diseases are caused by mutations in metabolite repair enzymes (9–11), and that pathway  
85 engineering can fail unless the necessary repair enzymes are installed (12). The emerging  
86 recognition of the nature and extent of metabolite damage and repair raised the question of the  
87 importance of metabolite repair for the survival and growth of a minimal genome like JCVI-  
88 Syn3/3A. By combining expert manual curation, comparative genomics, metabolomics,  
89 metabolic modeling, chemoinformatics, and experimental validation, we identified a set of  
90 chemical damage reactions likely to occur in JCVI-Syn3 and some of the damage repair and  
91 preemption activities that are encoded (or predicted) by this minimal genome.

92

93

## 94 **Results and Discussion**

### 95 **Identification and experimental validation of homologs of known metabolite repair** 96 **enzymes**

97 To identify the metabolite repair enzymes in JCVI-Syn3A we first manually scanned its  
98 proteome for homologs of known metabolite repair enzymes (6, 12, 13)(see Supplemental data  
99 S1 and supplemental methods). Several were found, as follows.

100 1. 5-FCL. 5-Formyltetrahydrofolate (5-CHO-THF) is a by-product of serine  
101 hydroxymethyltransferase (SHMT) (14)(Fig. 1A) that inhibits folate-dependent enzymes and  
102 must therefore be removed from the folate pool (15). Of various enzymes known to recycle 5-  
103 CHO-THF (16), the most widespread is 5-formyltetrahydrofolate cyclo-ligase (5-FCL) (encoded  
104 by the *fau/ygfA* gene (16) in *E. coli*). The JCVI-syn3A genome encodes a 5-FCL homolog  
105 (JCVISYN3A\_0443; 24% identity over 93% coverage); this gene was confirmed to encode an  
106 active 5-FCL by a complementation assay. Specifically, an *E. coli* K12  $\Delta ygfA$  strain does not  
107 grow on M9 minimal medium with 0.2% glucose as carbon source and 20 mM glycine as sole  
108 nitrogen source (16)(Fig. 1B). Expression of JCVISYN3A\_0443 from a pUC19 derivative  
109 plasmid allowed complementation of the growth phenotype (Fig. 1B). Note that the essentiality  
110 of JCVISYN3A\_0443 might not be due to the repair function alone, but also to a role in 5-CHO-  
111 THF-polyglutamate salvage as a unique source of 5,10-methenyltetrahydrofolate-polyglutamate  
112 (3).

113 2. Cellular thiol reductases. Like all organisms grown in the presence of oxygen, JCVI-syn3A  
114 will encounter oxidative stress that can damage macromolecules. Maintaining protein and small-  
115 molecule thiol groups in their reduced state is critical for cellular redox homeostasis (17).  
116 Thioredoxin/thioredoxin reductase is the dominant protein thiol oxidoreductase system in many  
117 organisms, using reducing equivalents ultimately derived from NAPDH (18, 19). The JCVI-  
118 Syn3A genome encodes homologs of the thioredoxin system proteins (TrxB/JCVISYN3A\_0819  
119 and TrxA/JCVISYN3A\_0065) that are most likely involved in reducing disulfide bonds in  
120 proteins and have already been partially characterized in other *Mycoplasma* species (Fig. 2A)(20,  
121 21). Both genes are essential (Supplemental data S1), supporting a key role of the TrxA/TrxB  
122 system in disulfide bond reduction. Note, however, that thioredoxin is also the hydrogen donor

123 to ribonucleotide reductase, and thus JCVISYN3A\_0819 and JCVISYN3A\_0065 may be  
124 essential due to this possible connection to deoxyribonucleotide biosynthesis (20, 22).

125 JCVI3\_0887 was found to be a homolog of CoA disulfide reductase (CoADR), which is  
126 proposed to be the major mechanism to maintain redox balance in certain bacteria (23). Because  
127 CoA is required for several reactions in the JCVI-syn3A metabolic model and is predicted to be  
128 imported from the medium, CoADR could be a minimalist solution to detoxify H<sub>2</sub>O<sub>2</sub>. We  
129 therefore tested the CoADR activity of the JCVISYN3A\_0887 protein *in vitro*.

130 JCVISYN3A\_0887 was found to be an active CoAD reductase that operates well at  
131 physiologically relevant pH (pH 7.5) (24) with reasonable  $K_M$  (0.17 mM) and  $k_{cat}$  (2.8 s<sup>-1</sup>) values  
132 (Fig. 2B). It had no detectable activity against oxidized glutathione or pantethine (Fig. 2C).  
133 While we cannot eliminate the possibility that reduced glutathione is imported from the medium  
134 and oxidized glutathione is exported, this is a less parsimonious solution to the redox balance  
135 problem than the CoA-based solution above.

136

### 137 **Functional analysis of orphan HAD family proteins identifies a nucleotide phosphatase** 138 **with possible dual roles**

139 Our second strategy to identify metabolite repair enzymes was based on the fact that  
140 various hydrolases of uncertain or unknown function were subsequently shown to participate in  
141 metabolite repair (8) Five genes encoding stand-alone members of the HAD (haloacid  
142 dehalogenase) hydrolase family (25) were identified in the JCVI-Syn3A genome (Supplemental  
143 data S1) and are conserved in the recently analyzed close mollicute relative *Mesoplasma florum*  
144 L1 (26) (Table 1). Such HAD hydrolases often participate in metabolite repair or homeostasis,  
145 as many damaged and/or toxic intermediates are phosphorylated (e.g. phosphosugars), and the  
146 first step in their recycling or removal requires a phosphatase (8, 27).

147 Comparative genomic analysis of the stand-alone HADs did not point to clear functional  
148 hypotheses, except for JCVISYN3A\_0728, whose location in a predicted operon with triose-  
149 phosphate isomerase and phosphoglycerate mutase suggested a role in sugar phosphate  
150 metabolism (Table 1). Possible functions for the HAD family proteins included: 1) metabolite  
151 repair enzymes on substrates to be identified; 2) missing phosphatases involved in primary  
152 metabolism identified by the metabolic model such as sedoheptulose 1,7-bisphosphate  
153 phosphatase or phosphatidate phosphatase; 3) nucleotide phosphatases involved in dNTP pool

154 maintenance. To discriminate among these hypotheses, we combined biochemical, genetic, and  
155 metabolomics studies.

156 All four of the HAD proteins that we were able to express in *E. coli* (JCVISYN3A\_0066,  
157 JCVISYN3A\_0077, JCVISYN3A\_0728, JCVISYN3A\_0907) were tested for activity against a  
158 panel of 94 phosphatase substrates (Supplemental Table S1) (28). The four proteins had  
159 detectable activity against the general phosphatase substrate *p*-nitrophenyl phosphate (*p*NPP) and  
160 different sets of physiological substrates (Fig. S1). The JCVISYN3A\_0728 enzyme was active  
161 against a wide range of nucleoside and sugar phosphates, the JCVISYN3A\_0907 and  
162 JCVISYN3A\_0077 enzymes were active against narrower ranges of sugar phosphates, and the  
163 JCVISYN3A\_0066 enzyme was active against FMN and CoA. That sugar phosphates are among  
164 the best substrates of the JCVISYN3A\_0728 enzyme is consistent with the genomically-  
165 predicted role in sugar phosphate metabolism, but no specific function or substrate could be  
166 assigned. Note, however, that the 94-substrate panel did not include damaged sugar phosphates.

167 We attempted to delete HAD-encoding genes in the JCVI-syn3A host as described in the  
168 Methods section. We expected this to be possible because transposon bombardment of the JCVI-  
169 syn3A genome indicated all five HADs were quasi-essential (i.e., required for fast growth but  
170 not essential for viability) [(3) and Supplemental data S1]. Deletion mutants were readily  
171 obtained for genes JCVISYN3A\_0066, JCVISYN3A\_0077, JCVISYN3A\_0728, and  
172 JCVISYN3A\_0907 (Supplemental data S2). Attempts to delete JCVISYN3A\_0710 using two  
173 different methods were unsuccessful (Supplemental data S2). It could be that the deletion of this  
174 gene resulted in an extremely slow-growing strain that could not be recovered using these  
175 approaches, or that JCVISYN3A\_0710 is in fact essential and the transposon insertions in the  
176 gene were artifacts. The fact that the same gene is also essential in *M. florum* (Table 1) would  
177 suggest that the latter hypothesis is correct

178 We observed no major differences in growth rates between JCVI\_Syn3A and any of the  
179 HAD mutants (Fig. S2). To conduct a metabolomics analysis, the four mutants and the parental  
180 JCVI-Syn3A control were grown in SP4-KO medium and harvested at the same point of log-  
181 phase growth. Three biological replicates were prepared and three technical replicates from each  
182 biological sample were distributed and further pelleted/rinsed/flash frozen/stored. Untargeted  
183 metabolomic analysis of the mutant samples was carried out to screen for a broad range of  
184 possible metabolic disruptions. The extraction, detection, and analyses of the metabolites are



185 described in detail in the Supplemental methods and Supplemental Tables S2 and S3. A total of  
186 4152 features were detected in JCVI-Syn3A samples using hydrophilic interaction liquid  
187 chromatography (HILIC) and mass spectrometry (Supplemental data S3). Metabolites were  
188 annotated using accurate mass in addition to matching experimental MS/MS spectra to MS/MS  
189 library spectra (MS/MS match) and/or matching experimental peaks to an in-house accurate  
190 mass/retention time library (m/z-RT match). In total 522 metabolites were annotated as known  
191 metabolites in cultures of JCVI-syn3A and mutants of JCVI-syn3A. Of these annotated  
192 metabolites, 70 had both MS/MS and m/z-RT matches, 324 were annotated based on MS/MS  
193 matches, 100 were annotated based on m/z-RT matches, and 28 annotations had MS/MS matches  
194 linked to a small number of candidate compounds (e.g., “hexose-phosphate”, which could be  
195 multiple phosphorylated six-carbon sugars) (Supplemental data S3). Technical variance was  
196 assessed by measuring 43 internal standard compounds, which are non-endogenous chemicals  
197 added to each sample and had an average coefficient of variance of 8.9% (Supplemental data  
198 S3).

199 Partial least squares discriminant analysis was used to find the variable importance in  
200 projection (VIP) scores of each annotated metabolite. The fifteen metabolites with the highest  
201 VIP scores (Fig. 3 and Fig. S3) showed little contamination from media, as determined by  
202 chemical analysis of unused media along with mutant samples. Most of these metabolites were  
203 below the limit of detection in unused media, and most of the rest were present at much lower  
204 abundance in media than in samples (>30-fold higher in samples compared to media) suggesting  
205 little to no contamination from residual media in samples (Supplemental data S3). Two  
206 metabolites (cytidine and thiamine) were found at similar abundance in media as compared to  
207 samples, suggesting these two compounds may be influenced by media contamination.

208  
209 Within this group of 15 metabolites with high VIP scores, the JCVISYN3A\_0728  
210 knockout showed significantly higher abundance of glycerophosphate, oleoyl lysophosphatidic  
211 acid, and palmitoylglycerol as compared to other genotypes (Fig. 3 and Fig. S3). We were not  
212 able to determine which form of glycerophosphate was increased, although the 3-phosphate is a  
213 priori more likely, being found in the metabolic model as a cardiolipin metabolism intermediate  
214 that is synthesized via phosphorylation of imported glycerol by GlpK (JCVISYN3A\_0218). As  
215 alpha-lysophosphatidic acid is produced from glycerol phosphate (3), these results suggest that

216 the JCVISYN3A\_0728 hydrolase could be involved in hydrolyzing glycerol phosphate (or a  
217 derivative thereof).

218  
219 The JCVISYN3A\_0066 knockout had significantly higher deoxyuridine monophosphate,  
220 inosine monophosphate, and deoxyinosine monophosphate, and lower thiamine and fructose-1-  
221 phosphate abundance as compared to other mutants (Fig. 3 and Fig. S3). It is therefore possible  
222 that JCVISYN3A\_0066 is one of the phosphatases previously found to hydrolyze the  
223 mononucleotides GMP, dAMP, dGMP, dUMP, and dTMP that were not identified in the  
224 metabolic reconstruction (3) and further biochemical characterization is needed.

### 225 226 **Comparative genomic approaches uncover a possible metabolite repair phosphatase**

227 Comparative genomic analyses allowed us to propose a function for the YqeK HD family  
228 phosphohydrolase that is fused to nicotinic acid mononucleotide adenylyltransferase (NadD) in  
229 most mycoplasmas and strongly physically clustered with NadD in many other gram-positive  
230 organisms (29) (Fig. 4 and S4A). This strong association led us to propose that the YqeK protein  
231 repairs mistakes made by the NadD enzyme. The canonical activity of NadD is to adenylate  
232 nicotinate-ribonucleotide (NaMN) using ATP as a donor of the AMP moiety (Fig. 4A).  
233 However, if another NTP or the deoxy-form of ATP is used by mistake, this would create an  
234 erroneous intermediate that would need to be hydrolyzed. We therefore expressed the  
235 JCVISYN3A\_0380 gene in *E. coli* as well as a variant encoding a His230Ala mutation (Fig.  
236 S4B). (The mutation of this residue, predicted to be critical for the phosphatase activity, was  
237 designed to stop product hydrolysis interfering with measurement of NadD activity.) The NadD  
238 protein of *Bacillus subtilis* was also expressed and purified as a benchmark. The mutant  
239 JCVISYN3A\_0380 protein and *B. subtilis* NadD were then tested for *in vitro* activity with  
240 various nucleoside triphosphates as substrates. As shown Fig. 5A, we found that the adenylation  
241 activity of the JCVISYN3A\_0380 His230Ala mutant was quite non-specific and actually worked  
242 better with dATP, CTP, or UTP than with the natural substrate, ATP, whereas the *B. subtilis*  
243 enzyme strongly preferred ATP. The JCVI-syn3 NadD enzyme can therefore readily form  
244 deoxy-adenosine, -cytidine, or -uridine analogs of the NAD precursor nicotinate adenine  
245 nucleotide (NaAD) (which can presumably be converted to potentially inhibitory analogs of  
246 NAD and NADP).



247 We then tested the JCVI-Syn3 YqeK domain for phosphatase activity using the different  
248 NaAD analogs that could be produced by the JCVI-syn3A NadD enzyme. As shown Fig. 5B, the  
249 YqeK domain has activity towards the cytosine (NaCD) and uracil (NaUD) analogs of NaAD  
250 that is as high or higher than that against NaAD itself (which agrees with the preference of the  
251 NadD domain to make these analogs).

252 In order to assess the relative binding capacity for predicted substrates for YqeK, we  
253 docked the proposed molecules into the structure. The active site was defined at the di-iron site  
254 and molecules were modeled with phosphate groups coordinated to the metals as seen in  
255 representative structures (PDB codes: CCG3, 2O08 and 2OGI). The conformations of the  
256 liganded substrates were optimized through rounds of energy minimization. The results show  
257 that the active site readily accommodates 2'-deoxy-NaAD (Fig. S4C) and interactions of the  
258 adenosine and nicotinate moieties are consistent with other NaAD-binding proteins (e.g., PDB  
259 1NUQ and 2QTR). Of note, a conserved Tyr82 clashes with the 2'-hydroxyl of NaAD, not  
260 present in 2'-deoxy-NaAD.

261 In testing various possible substrates, we found the YqeK domain also had high activity  
262 against 8-oxo-GTP, although judging from relative activities with 0.05 mM and 0.5 mM  
263 substrate, the  $K_M$  is likely higher than for the other substrates tested (Fig. 5B). Consistent with  
264 this finding, we showed that the genes encoding the JCVI-syn3A NadD-YqeK fusion can  
265 partially complement the *E. coli mutT* high mutation rate phenotype (measured as Rif<sup>R</sup> ratios)  
266 (Fig. 5C). The partial complementation was also observed when expressing the YqeK domain  
267 alone, but not the NadD domain alone. Finally, it was recently shown that YqeK of gram-  
268 positive bacteria such as *B. subtilis* or *M. pneumoniae* are members of a novel diadenosine  
269 tetraphosphate (Ap<sub>4</sub>A) hydrolase family (30). In combination, these observations suggest that  
270 YqeK is a versatile phosphatase with several functional roles. Unfortunately, the genetic  
271 dissection we performed in JCVI-Syn3A did not allow us to confirm any of these roles *in vivo*.  
272 Indeed, the available transposon insertion data ((3) and Supplemental data S1) suggested that the  
273 NadD domain is essential and the YqeK domain is quasi-essential as a few hits in the YqeK  
274 region of the gene were detected in the first Tn round, these disappeared after the fourth round of  
275 growth. We were unable to isolate a JCVISYN3A\_0380 gene deletion mutant in JCVI-Syn3B  
276 despite several attempts. We were, however, able to construct a derivative that contains the  
277 His230Ala point mutation inactivating the YqeK activity (Supplemental data S2) that did not

278 show any growth rate defect or any obvious metabolite imbalance (Fig. S2). Further studies will  
279 accordingly be needed to define the role of the YqeK proteins in metabolism.

280

### 281 **Metabolomics-driven exploration of damage and repair chemistry in JCVI-Syn3**

282 Thus far, all of our damage and repair cases began with an analysis of specific classes of  
283 genes in the JCVI-Syn3A genome, and from these cases we see clear instances of metabolite  
284 damage and repair occurring in the JCVI-Syn3A strain. But do these examples represent isolated  
285 exceptions, or are they the tip of an iceberg of uncharacterized metabolic chemistry occurring  
286 even in the simplest organism that can currently be constructed? To gain insights into this  
287 question, we applied a more systematic exploratory approach that started with the metabolomics  
288 data generated from our JCVI-Syn3A cell samples (see Supplemental Table S3).

289 We focused this analysis specifically on the set of 480 metabolites observed in these  
290 samples that satisfied two criteria: (1) the mass-spectrum-observed metabolite was confidently  
291 identified with a fully defined molecular structure; and (2) the metabolite was at least as  
292 abundant in the JCVI-Syn3A cells as in the growth medium. . Supplemental Table S4E contains  
293 this list of 480 metabolomics peaks filtered from the full set of metabolomics data provided in  
294 Table S3. We next compared the 480 identified peaks to the 33,978 compounds in the  
295 ModelSEED database (31), which includes all of KEGG (32) and MetaCyc (33), resulting in 217  
296 (45%) matches (see Supplemental Table S4E). We next compared the 480 identified peaks to the  
297 33,978 compounds in the ModelSEED database (32), which includes all of KEGG (33) and  
298 MetaCyc (34), resulting in 217 (45%) matches (see Supplemental Table S4E). This analysis  
299 revealed that over half the observed metabolites fall outside current biochemistry databases, and  
300 that even for compounds that do occur in existing databases, they take part in pathways that are  
301 not included in the current representation of JCVI-Syn3 metabolism. To predict potential  
302 chemical routes to as many of the observed metabolites as possible without limiting our search to  
303 known chemistry or straying too far from known JCVI-Syn3 metabolism, we applied the  
304 cheminformatics tool PickAxe (34). This tool applies generalized reaction rules to predict  
305 potential novel reactions that a given set of metabolites (in this case, all JCVI-Syn3 metabolites)  
306 may undergo given known spontaneous (7) and enzymatic(35, 36) chemical mechanisms. We  
307 started our PickAxe exploration with the 304 metabolites included in the JCVI-Syn3A model and  
308 applied the PickAxe algorithm for multiple iterations to allow for the generation of multistep

309 pathways (see methods). We used both spontaneous and enzymatic reaction rules in the PickAxe  
310 expansion, enabling prediction of pathways comprised of a mixture of spontaneous and  
311 enzymatic reaction steps (as is the case with damage and repair pathways). In the initial iterations  
312 of the PickAxe algorithm, we discovered an increasing number of compounds generated that  
313 matched our observed metabolites, but after six iterations, these hits tapered off to just one new  
314 compound produced that matched an observed metabolite (blue line in Fig. 6). Interestingly, the  
315 number of compounds predicted by PickAxe that matched known biochemistry in the  
316 ModelSEED database (green line in Fig. 6) followed a similar trend. We halted the PickAxe  
317 expansion at this stage given the diminishing returns in useful or recognizable chemistry being  
318 generated. Overall, the final chemical network generated by PickAxe included 33,934  
319 compounds, 61,939 reactions, and matched a total of 182 distinct metabolites (including the  
320 original 57 matching the JCVI-Syn3 model) and 1090 ModelSEED compounds (see  
321 Supplemental data S4C-D).

322 The network generated by PickAxe represents a pool of hypothetical chemistry possible  
323 given our reaction rules and the compounds in the JCVI-Syn3A model. We then used a new flux  
324 balance analysis formulation, called metabo-FBA, to select a minimal subset of these reactions  
325 that can connect the functioning JCVI-Syn3A model to as many observed metabolites as possible  
326 using mass and energy balanced pathways (see Methods). Because we are working with a  
327 minimal genome with limited enzymatic diversity and the present study specifically focused on  
328 metabolite damage, we favored solutions that involved as many reactions generated by  
329 spontaneous reaction rules as possible. Using this approach, we were able to produce a predicted  
330 flux profile that succeeded in simultaneously pushing flux through reactions involving  
331 compounds that matched 182 distinct observed metabolites (see solution depicted in Fig. 7 and  
332 data in Supplemental data S4A and E). This solution included 145 (58%) of the 252 reactions in  
333 the JCVI-Syn3 model (purple reactions in Fig. 7), 129 additional ModelSEED reactions  
334 (primarily predicted enzymatic reactions; green reactions in Fig. 7), 84 novel enzymatic reactions  
335 (blue reactions in Fig. 7), and 74 novel spontaneous reactions (red reactions in Fig. 7) (data in  
336 Supplemental data S4A). The fixed image of our flux solution depicted in Fig. 7 is of limited  
337 value for permitting a detailed exploration of the fluxes, so we are also including all data files  
338 and instructions needed to replicate this view in a fully functioning dynamic Escher map (see

339 Supplemental data S5). Also, the fully expanded version of the JCVI-Syn3A model used to  
340 generate this flux solution is provided in SBML and JSON format in Supplemental data S5.

341 This flux solution represents only one of many possible solutions to explain the observed  
342 metabolomics data based on known and novel biochemical reactions. It is unlikely that this  
343 solution is completely correct, but the true solution must make use of similar chemistry, start  
344 with the same initial high-confidence JCVI-Syn3A compounds, and produce the same observed  
345 metabolic intermediates, meaning the true solution cannot depart too significantly from our  
346 selected solution. Thus, while we cannot define exact mechanisms for producing observed  
347 metabolites from this analysis, we can observe significant chemical trends that reveal insights  
348 into areas of limited understanding of metabolic chemistry and the role of spontaneous reactions  
349 in that chemistry.

350

351 Looking at the map broadly (Fig. 7), it is immediately apparent that there are hotspots of  
352 intense chemical expansion (adenine, cytosine, sugars, pyruvate, amino acids, central carbon  
353 trunk reactions, CoA) and other regions with little or no expansion (deoxynucleotides, guanine,  
354 thymidine, THF, riboflavin, NAD). This likely has to do with the concentration and reactivity of  
355 the associated compounds. For example, deoxynucleotides lack a chemically active hydroxyl  
356 group present in standard nucleotides. Many of the intensely branching compounds represent  
357 high concentration metabolic starting points (e.g., sugars), end points (amino acids), and high  
358 flux intermediates (e.g., pyruvate). Given their higher concentrations, it is more likely that  
359 metabolomics will detect these compounds and their derivatives, and that these compounds will  
360 undergo additional chemistry.

361 The large number of ModelSEED reactions and the many predicted novel enzymatic  
362 reactions proposed by this approach represent previously unannotated but potential promiscuous  
363 side activities of existing annotated gene products in JCVI-Syn3A. The extensive metabolomic  
364 evidence for the presence of the products of these reactions points strongly to the presence of the  
365 reactions themselves. This is best exemplified by the cluster of ModelSEED reactions expanding  
366 from the glucose-6-phosphate (g6p) node of the JCVI-Syn3A model (see Fig. 7A). These  
367 reactions involve phosphorylation and hydrolysis interconverting many different sugars and  
368 polysaccharides, all of which have evidence for existence in our metabolomics data. While the

369 model only contains reactions for glucose as a representative sugar, it is likely that this model  
370 and many other similar models are substantially understating the promiscuity of these enzymes.

371 Also of note is how many of the pathways predicted in JCVI-Syn3A by our metabo-FBA  
372 method involve a mixture of database reactions, predicted spontaneous reactions, and novel  
373 enzymatic reactions (30/50 total pathways). Any analysis that focused on only one or even two  
374 of these three reaction sources would explain a far smaller number of observed metabolites due  
375 to holes and dead-ends in the predicted pathways. A complete understanding of metabolism  
376 requires all three reaction data sources.

377 Another significant trend is the large portion of new predicted chemistry surrounding  
378 amino acids. A significant number of observed metabolomics peaks relate to amino acid  
379 derivatives, including numerous dipeptides and acetylated amino acids (see Fig. 7B). The  
380 dipeptides primarily serve as nutrients for the JCVI-syn3 strain, which contains the peptidases  
381 needed to degrade these compounds (a large number of the ModelSEED reactions added by our  
382 metabo-FBA approach relate to dipeptide transport and degradation). However, the acetylated  
383 amino acids are interesting as only 7 out of 10 of these compounds were found in any  
384 biochemistry databases, which also lacked spontaneous reactions for producing these  
385 compounds. Yet, metabolomics evidence was found for all 10 compounds being present in the  
386 JCVI-Syn3A strain. The metabo-FBA approach added 10 predicted spontaneous acetylation  
387 reactions, using acetyl-phosphate as a donor, based on PickAxe predictions. This demonstrates  
388 how readily acetylation occurs in these systems, either by spontaneous action or by promiscuous  
389 enzyme activity, and it highlights the particular vulnerability of amino acids to this acetylation.

390 In addition, these results further support certain hypotheses made previously about the  
391 main metabolic network of JCVI-Syn3A (3) both with regard to acetyl phosphate as well as the  
392 enzymes producing/consuming it. The *in vivo* essentiality of phosphate acetyltransferase  
393 (JCVISYN3\_0229) and acetate kinase (JCVISYN3\_0230) was puzzling, given that the preceding  
394 genes in the pathway, the remaining subunits of pyruvate dehydrogenase (JCVISYN3\_0227/8),  
395 were found to be non-essential *in vivo*. It had been hypothesized that the two former enzymes  
396 thus were not essential because acetate fermentation was essential for the cell, but rather because  
397 buildups of acetyl-CoA or acetyl phosphate needed to be prevented, with acetyl phosphate a  
398 known protein acetylation agent (37).

399           Firstly, the current results hence support the role of acetyl phosphate as a biologically  
400 relevant acetylation agent in JCVI-Syn3A not only for free amino acids but also for proteins, as  
401 some of the identified amino acids had side chain acetylations. Secondly, the results also support  
402 the hypothesized essential role of acetate kinase as a means of preventing excess buildups of  
403 acetyl phosphate. Thirdly, if acetyl phosphate is indeed the acetylation agent at play, then this  
404 implies some source for acetyl phosphate/acetyl-CoA. Furthermore, if at least one of the two  
405 hypotheses for the essentiality of phosphate acetyltransferase and acetate kinase is correct (the  
406 latter now being supported by the current results), then this source would have to be intracellular  
407 production of acetyl-CoA rather than conversion of external acetate (as it would be these two  
408 enzymes which would then produce acetyl phosphate and acetyl-CoA in the first place).  
409 Production of acetyl-CoA in JCVI-Syn3A had not been certain previously, as the first subunit of  
410 pyruvate dehydrogenase and the related NADH oxidase had been removed in JCVI-Syn3A and  
411 the remaining components tentatively assumed to still be active. Alternatively, oxidation of  
412 acetaldehyde to acetyl-CoA had been hypothesized as a possible function for the remaining  
413 pyruvate dehydrogenase complex. The current results would suggest at least one of these two  
414 hypothesized pathways to indeed produce acetyl-CoA – or there would have to be yet another  
415 mechanism.

416           We are also particularly interested in using these analyses to understand the relative  
417 prevalence, and thus importance, of our various proposed mechanisms for spontaneous  
418 chemistry. One can examine prevalence in two ways, and our analyses explore both: (1) how  
419 ubiquitous are the active sites that can undergo each given class of spontaneous reaction among  
420 the metabolites present in JCVI-Syn3A; and (2) how often can each chemistry be observed to  
421 happen based on metabolomics data. We can answer the first question by counting how many  
422 reactions are generated by each spontaneous reaction operator in our PickAxe expansion of the  
423 JCVI-Syn3A metabolites (orange bars in Fig. 8). From this, we find *carbamylation* to be the most  
424 dominant spontaneous mechanism with nearly 2000 reactions generated. *Benzoquinone addition*  
425 reactions are also very prevalent with almost 1500 reactions generated. However, just because  
426 chemistry occurs on a common active site does not mean it will be readily observed. Products  
427 from the most visible chemistry are likely to accumulate and thus be observed in metabolomics  
428 data. Thus, the reactions selected for addition by our metabo-FBA method represent the most  
429 visible in terms of producing significant amounts of observable products. Counting the reactions



430 selected by metabo-FBA for each of our spontaneous reaction mechanisms (gray bars in Fig.8)  
431 reveals acylation reactions as being the most common by far, with transamination also being  
432 quite common. These results do not necessarily mean that all the other chemistry predicted by  
433 our PickAxe analysis outside of those reactions involving or leading to observed metabolites is  
434 not happening. Much of this chemistry may still be hidden from analysis if: (1) it only involves  
435 compounds with concentrations below the threshold of detection; (2) it involves metabolites that  
436 are not easily observed (e.g. highly unstable or volatile compounds); (3) it involves metabolites  
437 that are not easily identified (e.g. new compounds with unknown fragmentation patterns and no  
438 available standards). Thus, this difference between predicted chemistry and observed chemistry  
439 could provide interesting targets for improving methods for observing and identifying  
440 metabolites. Additionally, it is important to recognize that many PickAxe reaction types involve  
441 co-substrates that are not present in the JCVI-Syn3A strain (e.g. benzoquinone or carbamoyl  
442 transferase reactions), and thus it is expected that the products from these reaction types will not  
443 appear in JCVI-Syn3A.

444 An example of an important intermediate metabolite that arises from and participates in  
445 spontaneous damage reactions but could not be observed using current metabolomics methods  
446 was methylglyoxal (see Fig. 7C). While methylglyoxal was not among the observed metabolites  
447 due to small size and volatility, metabo-FBA added reactions involving this compound because it  
448 leads to numerous downstream potential damage and repair reactions. A more detailed  
449 discussion of methylglyoxal follows.

450

### 451 **Exploring possible mechanisms for JCVI-Syn3A to cope with methylglyoxal stress**

452 Methylglyoxal is necessarily generated from the triose phosphates formed by JCVI-  
453 Syn3A metabolism (38) but the classical glyoxalase system comprising the glutathione-  
454 dependent GloA and GloB enzymes (39) is absent. Likewise, enzymes with minor  
455 methylglyoxal-detoxifying activities, such as aldose reductases and keto-aldehyde reductases  
456 (40–42) are not encoded in the JCVI-Syn3A genome. The only candidate enzyme that we  
457 identified as potentially able to counter methylglyoxal-induced damage is JCVISYN3A\_0400,  
458 which encodes a homolog of DJ-1. The DJ-1 superfamily has several functionally distinct clades,  
459 and phylogenetic analysis places JCVISYN3A\_0400 in the YajL/DJ-1 clade (Fig. S6). The

460 clades of the DJ-1 superfamily are not isofunctional and four subfamilies are found in *E. coli*  
461 alone (encoded by the *hchA*, *yajL*, *yhbO* and *elbB* genes).

462 Although the biochemical functions of many DJ-1 superfamily members remain  
463 uncertain, the functionally characterized DJ-1 superfamily proteins are involved in stress  
464 response and detoxification mechanisms (43). Some are thought to be deglycases (44),  
465 glyoxalases (45) and/or aldehyde-adduct hydrolases (46). We were not able to reproduce the  
466 previously reported glyoxal and/or methylglyoxal sensitivities of the  $\Delta yajL/\Delta hchA$  *E. coli* K-12  
467 BW25113 strain (44), but we did observe a defect both in its growth rate and yield (Fig. 9A and  
468 Fig. S7A). Expression of the *E. coli yajL* or JCVISYN3A\_0400 genes *in trans* complemented  
469 this growth phenotype (Fig. 9A and Fig. S7A) suggesting JCVISYN3A\_0400 was indeed in the  
470 same DJ-1 subgroup as YajL.

471 To test the hypothesis that JCVISYN3A\_0400 is involved in methylglyoxal  
472 detoxification we expressed and purified the recombinant protein and measured its glyoxalase  
473 activity *in vitro*. As shown Fig. 9B the JCVISYN3A\_0400 protein has very low but measurable  
474 methylglyoxalase activity ( $k_{cat}=0.025\pm 0.002 \text{ sec}^{-1}$ ,  $K_M=1.23\pm 0.3 \text{ mM}$ ), far lower than obtained  
475 for the positive control proteins *S. cerevisiae* Hsp31 ( $k_{cat}=0.220\pm 0.005 \text{ sec}^{-1}$ ,  $K_M=0.11\pm 0.01 \text{ mM}$ )  
476 and somewhat lower than human DJ-1 ( $k_{cat}=0.073\pm 0.002 \text{ sec}^{-1}$ ,  $K_M=0.34 \pm 0.03 \text{ mM}$ ). The  $\sim 20$   
477  $\text{M}^{-1} \text{ sec}^{-1} k_{cat}/K_M$  value for JCVISYN3A\_0400 is five to six orders of magnitude lower than that  
478 of glyoxalase I, the dedicated glutathione-dependent glyoxalase in most organisms (47). Even  
479 compared to other DJ-1 superfamily glyoxalases that have relatively low catalytic efficiency,  
480 JCVISYN3A\_0400 is a poor enzyme. The lactate oxidase-coupled assay used here is specific to  
481 L-lactate, which should detect all the lactate produced by JCVISYN3A\_0400, as previous reports  
482 indicate that DJ-1 clade enzymes produce only L-lactate (48). However, the more proficient  
483 Hsp31 glyoxalases produce racemic (D/L)-lactate (48), and thus the rate measured in this assay  
484 for *S. cerevisiae* Hsp31 is probably about half the true rate.

485 Because DJ-1 superfamily members have been reported to be generalist deglycases (49),  
486 we tested the deglycase activity of JCVISYN3A\_0400 against the methylglyoxal-CoA  
487 hemithioacetal (Fig. S7B). CoA was used as the thiol because the absence of glutathione  
488 biosynthetic enzymes in JCVI-Syn3A means that CoA may be the principal small molecule thiol  
489 in the cell (see above). JCVISYN3A\_0400 had no detectable deglycase activity against  
490 methylglyoxal-CoA hemithioacetal, while human DJ-1 had a low activity ( $k_{cat}=0.021\pm 0.003 \text{ sec}^{-1}$ ,

491  $K_M=0.39\pm 0.18$  mM). Therefore, JCVISYN3A\_0400 appears unlikely to efficiently detoxify  
492 methylglyoxal via either glyoxalase or deglycase activities if the *in vitro* rates are similar to the  
493 *in vivo* activity of the protein. It is possible that JCVISYN3A\_0400 and other DJ-1-type  
494 glutathione-independent methylglyoxalases may have some unidentified positive effector *in vivo*  
495 that could enhance their cellular activity, although there is currently no direct experimental  
496 evidence for this. In summary, while results suggest that JCVISYN3A\_0400 and YajL are iso-  
497 functional, the molecular function of these proteins remain mysterious.

498

## 499 **Conclusion**

500 Metabolite damage arising from side-reactions of enzymes and spontaneous chemistry has often  
501 been ignored or seen as a minor metabolic inconvenience that does not warrant investment in  
502 enzymes to prevent or repair it (6) . Biochemical, genetic, and engineering evidence  
503 accumulating over the past decade has been changing this view (6, 7, 10, 12, 50, 51). The  
504 biochemical and genetic results we present here constitute particularly persuasive additional  
505 evidence by demonstrating that stripping a genome down to its barest essentials leaves  
506 metabolite damage-control systems in place. Furthermore, our metabolomic and cheminformatic  
507 results point to the existence of a network of metabolite damage and damage-control reactions  
508 that extends far beyond the corners of it characterized so far. In sum, there can be little room left  
509 to doubt that damage itself and the systems that counter it are mainstream metabolic processes.

510

## 511 **Methods**

### 512 **Bioinformatics**

513 The BLAST tools (52) and CDD resources at NCBI (<http://www.ncbi.nlm.nih.gov/>) (53) were  
514 routinely used. Sequences were aligned using Clustal Omega (54) or Multialin (55).  
515 Phylogenetic distribution was analyzed in the SEED database (56). Results are available in the  
516 “YqeK” subsystem on the PubSEED server  
517 ([http://pubseed.theseed.org//SubsysEditor.cgi?page=ShowSpreadsheet&subsystem=NadD-](http://pubseed.theseed.org//SubsysEditor.cgi?page=ShowSpreadsheet&subsystem=NadD-YqeK_fusion_display)  
518 [YqeK\\_fusion\\_display](http://pubseed.theseed.org//SubsysEditor.cgi?page=ShowSpreadsheet&subsystem=NadD-YqeK_fusion_display)). Physical clustering was analyzed with the SEED subsystem coloring tool  
519 or the SeedViewer Compare Regions tool (56) and the clustering figure was generated with  
520 GeneGraphics (57). Phylogenetic trees were constructed with Mega 6 (58). Student’s t-test  
521 calculations were performed using the VassarStats web-tools (<http://vassarstats.net>).

522

523

524

### 525 **Prediction of novel potential chemistry using PickAxe**

526 Expanded chemistry was generated using the PickAxe app in KBase, as shown in this narrative:

527 <https://narrative.kbase.us/narrative/29280>. This app uses the open source RDKit package to

528 apply sets of SMARTS-based chemical reaction rules, derived from previously published

529 chemical damage (7) and enzyme promiscuity (34) studies, to an input set of compounds to

530 produce all possible reactions and products that might arise from that chemistry. This analysis

531 can be run iteratively through repeated application of the reaction rules to all new products that

532 arise from previous generations. We applied the PickAxe approach for six iterations, retaining all

533 compounds that matched the JCVI-Syn3A model, the ModelSEED database (31), or an observed

534 metabolite.

535

### 536 **Metabo-flux balance analysis to predict minimal reactions to reach observed metabolites**

537 In metabo-flux balance analysis (metabo-FBA), constraints are added to the standard FBA

538 formulation to force flux through one or more reactions involving an observed metabolite. In this

539 formulation, a variable is added for each observed peak ( $p_i$ ) and a variable is added for each

540 metabolite that has been mapped to the peak (because peaks lack stereochemistry, they may be

541 mapped to multiple possible stereoisomers). Next, a constraint is added stating that a peak cannot

542 be active unless one or more of its associated metabolites is active (where  $\lambda_{i,j}$  is a mapping

543 variable equal to 1 if metabolite  $j$  is mapped to peak  $i$  and zero otherwise):

$$544 \quad p_i \leq \sum_j^{\text{Compounds}} \lambda_{i,j} m_j$$

545 A constraint is also added stating that no metabolite can be active unless at least one

546 reaction in which the metabolite is involved is carrying flux (where  $\gamma_{j,k}$  is a mapping variable

547 equal to 1 if metabolite  $j$  is involved in reaction  $k$  and zero otherwise):

$$548 \quad m_j \leq \sum_k^{\text{Reactions}} 100\gamma_{j,k} v_k$$

549 To maximize active metabolites, the objective of the problem is then set to maximize the

550 sum of all  $p_i$ . While  $p_i$  and  $m_j$  can be specified as binary variables, it works equally well and is

551 less computationally expensive to use continuous variables bounded between 0 and 0.1. To avoid  
552 the trivial solution of activating metabolites by pushing flux through both directions of reversible  
553 reactions or around mass balanced flux loops, it is essential to also employ thermodynamics  
554 constraints in some form in this formulation (59).

555

### 556 **Synthesis of NaAD<sup>+</sup> analogs and nicotinic acid riboside (NaR)**

557 NaMN (0.5 mM), 4 mM MgCl<sub>2</sub>, 5 units/ml yeast inorganic pyrophosphatase, 1 mg/ml BSA and  
558 2 mM (d)NTP (dATP, CTP, GTP or UTP) were incubated with 150 µg NadD-YqeKH230A  
559 enzyme overnight at 37° C in 20 mM HEPES-KOH, pH 7.2, 100 mM NaCl, 0.2 mM DTT, 1%  
560 glycerol. Assays were deproteinized using Amicon 10K cutoff centrifugal filters, concentrated *in*  
561 *vacuo* and purified by HPLC (Waters 2695 Separation module and Waters 2998 PDA detector)  
562 using a C18 column (Thermo Scientific Hypersil GOLD C18 5 µm, 250×4.6 mm) with a column  
563 guard with 20 mM ammonium bicarbonate / acetic acid, pH 6.0. Purified NaAD<sup>+</sup> analogs were  
564 lyophilized and resuspended in 10 mM HCl, pH 2.0.

565 To synthesize a NaR standard, NaMN (10 mM) was dephosphorylated with 20 units CIP  
566 overnight at 37° C. The mixture was deproteinized using Amicon 10K cutoff centrifugal filters  
567 and used as a standard as is. The following extinction coefficients were used to quantify NaAD<sup>+</sup>  
568 and its analogs: NaAD<sup>+</sup> 19.4 × 10<sup>-3</sup> M<sup>-1</sup>, dNaAD<sup>+</sup> 19.4 × 10<sup>-3</sup> M<sup>-1</sup>, NaCD<sup>+</sup> 11.9 × 10<sup>-3</sup> M<sup>-1</sup>, NaGD<sup>+</sup>  
569 16.4 × 10<sup>-3</sup> M<sup>-1</sup>, NaUD<sup>+</sup> 13.3 × 10<sup>-3</sup> M<sup>-1</sup>. Extinction coefficients were based on published  
570 extinction coefficients of NAD<sup>+</sup> analogs (60) . To adjust for the nicotinic acid moiety, the  
571 difference of extinction coefficients of nicotinic acid (4.2 × 10<sup>-3</sup> M<sup>-1</sup>) and nicotinamide (2.78 ×  
572 10<sup>-3</sup> M<sup>-1</sup>) (61) was added to those of the published NAD<sup>+</sup> analogs.

573

### 574 **Media, strains, and genetic manipulations**

575 All strains, plasmids and oligonucleotides used in this study are listed in Table S4 and Table S5.  
576 Bacterial growth media were solidified with 15 g/l agar (BD Diagnostics Systems) for the  
577 preparation of plates. *E. coli* were routinely grown on LB medium (BD Diagnostics Systems) at  
578 37 °C unless otherwise stated. Transformations were performed following standard procedures  
579 (62). IPTG (100 µM), Ampicillin (Amp, 100 µg/ml), Kanamycin (Km, 50 µg/ml), l-Arabinose  
580 (Ara, 0.02–0.2%), Chloramphenicol (Cm, 25 µg/ml) and Rifampicin (Rif, 25 µg/ml) were used  
581 when appropriate. Bacterial M9 minimal medium (62), 0.4% (w/v) glucose was used either with

582 NH<sub>4</sub>Cl (20 mM) or glycine (50 mM) as the nitrogen source. P1 transduction was performed  
583 following the classical methods (63). The Kan<sup>R</sup> marker was eliminated from the BW2113  
584  $\Delta yajL::Kan^R$  strain by the procedure described by Cherepanov and Wackernagel (64).  
585 Transductants from BW2113  $\Delta hchA::Kan^R$  to BW2113 $\Delta yajL$  were checked by PCR for  
586 transduction of the  $\Delta hchA::Kan^R$  allele into the recipient strains using primer pairs [DH492/493  
587 (ext); DH494/495 (int) and DH480/481 (ext); DH482/483 (int)] respectively.

588 JCVI-syn3A is a near minimal bacterial cell first reported by Breuer *et al.* (3) that  
589 contains a subset of the genes in *Mycoplasma mycoides* subspecies *capri* strain GM12.  
590 Mycoplasmas were grown in SP4 broth (65) that contains 17% KnockOut Serum Replacement™  
591 instead of 17% fetal bovine serum and is referred to as SP4-KO as described in the supplemental  
592 Methods.

593

#### 594 **Construction and analysis of JCVI\_Syn3A hydrolase gene deletion mutants.**

595 Construction of gene knockout mutants in JCVI-Syn3A was a multistep process, and two  
596 different protocols were used. Protocol I entailed CRISPR/Cas9 mediated removal of an  
597 individual target gene from a JCVI-Syn3A genome cloned as a yeast centromeric plasmid (YCp)  
598 in yeast strain VL648NCAS9\_Syn3A that carries the *cas9* gene in the yeast genome and  
599 expresses Cas9 constitutively (2, 66, 67). Following the CRISPR/Cas9/homologous  
600 recombination with a donor DNA to re-circularize the JCVI-syn3A YCp, each mutated genome  
601 was transplanted by standard procedures (68, 69) in order to produce JCVI-syn3A bacteria  
602 lacking the respective target gene. Protocol I successfully removed gene JCVISYN3A\_0728 but  
603 did not yield bacterial deletion mutants for any of the other four hydrolase genes. Protocol II,  
604 which is more complicated, was then used to make deletion mutants for the other hydrolase  
605 genes JCVISYN3A\_0066, JCVISYN3A\_0077, JCVISYN3A\_0710, and JCVISYN3A\_0907.  
606 Using the yeast deletion constructs generated in JCVI-syn3A YCp using Protocol I, a second  
607 CRISPR/Cas9 was applied to install each respective hydrolase gene behind its native promoter  
608 between loxP sites in a non-essential region of the JCVI-syn3A genome. These four YCps were  
609 successfully transplanted to generate individual JCVI-syn3A bacteria, each with the respective  
610 target gene in essentially the same new location. We then transformed these bacterial relocation  
611 mutants, harboring the target gene between loxP sites, with a plasmid containing i) a Cre  
612 recombinase gene under transcriptional control of a mycoplasma promoter and (ii) a puromycin



613 resistance gene. With this plasmid positioned between the same two loxP sites in the relocation  
614 mutants, cells that were plated on Sp4 growth media containing puromycin, efficiently  
615 exchanged the puromycin resistance cassette for genes JCVISYN3A\_0066, JCVISYN3A\_007,  
616 and JCVISYN3A\_0907, yielding the desired bacterial deletion mutants. We did not obtain a  
617 JCVISYN3A\_0710 deletion mutant. These protocols are described in detail in the  
618 **Supplemental data S2** file.

619

620 **Inactivation of the hydrolase encoding domain of gene JCVISYN3A\_0380 by converting**  
621 **the His codon at position 230 to an Ala (His230Ala).**

622 This was done using CRISPR/Cas9 as described previously to cut a yeast clone of the  
623 JCVI-syn3A YCp in gene JCVISYN3A\_0379. Next, while the CRISPR cut JCVI-syn3A YCp  
624 was still in yeast, a 1727 bp DNA molecule made using a multistage PCR that encoded gene  
625 MMSYN1\_0380 with the desired His to Ala mutation at codon 230 and flanked by sections of  
626 genes JCVISYN3A\_0379 and JCVISYN3A\_0381 was recombined into the linear JCVI-syn3A  
627 YCp. The resulting mutated plasmid was installed in a *Mycoplasma capricolum* cell using  
628 genome transplantation to create the JCVI-syn3A with the mutated JCVISYN3A\_0380. The  
629 process is described in detail in the Supplemental data S2 file.

630

631 **Plasmid constructions for expression JCVI-syn3A genes in *E. coli***

632 The sequences encoding all the JCVI-syn3A genes characterized in this study were codon-  
633 optimized by the supplier (GenScript, Piscataway, NJ) for expression in *E. coli*. They were  
634 synthesized with added restriction sites at the 5' and 3' ends and cloned in different vectors:  
635 pUC19 for JCVISYN3A\_0400, JCVISYN3A\_0443 and JCVISYN3A\_0887 at SphI and NcoI  
636 sites; pUC57 for JCVISYN3A\_0380 at NdeI and XhoI sites, or pET28a (JCVISYN3A\_0728,  
637 JCVISYN3A\_0066, JCVISYN3A\_0077, JCVISYN3A\_907) at XbaI and XhoI sites which added  
638 a C-terminal His-tag. The nucleotide sequences of all synthesized genes are given in  
639 Supplemental Methods and the corresponding plasmids listed in Supplemental Table S4. The  
640 sequences of the oligonucleotide primers used to subclone certain synthesized genes from  
641 pUC19/pUC57 to other vectors are given Supplemental Table S5. JCVISYN3A\_0887 was  
642 cloned in the NcoI and BlnI sites of pET28 which added a C-terminal His tag after PCR

643 amplification from pUC19-887 using the DH526 and DH527 primers. JCVISYN3A\_0380 was  
644 cloned in the NcoI and PstI sites of pBAD24 after PCR amplification from pUC57-380 using the  
645 DH540 and DH541 primers. The same restriction sites were used to clone in pBAD24 the  
646 fragment encoding only the NadD<sub>M</sub> domain (amplified by PCR from pUC57-380 using the  
647 DH540/DH584 primer pair) and the YqeK<sub>M</sub> domain (amplified by PCR from pUC57-380 using  
648 the DH585/DH541 primer pair). Design of the primers to separate the domains was based on  
649 multiple alignment shown Fig. S4B. The JCVISYN3A\_0380 was sub-cloned from pUC57-380  
650 after digestion with NdeI and XhoI restriction sites and ligated into the matching restriction sites  
651 of pET28a, which adds an N-terminal His tag.  
652 *BsNadD<sub>Bs</sub>* was PCR amplified with Phusion High-Fidelity DNA polymerase (New England  
653 BioLabs) from *Bacillus subtilis* 168 genomic DNA using primers BsNadD\_Fw and  
654 BsNadD\_Rv-XhoI digested with NdeI/XhoI and ligated into the matching sites of pET28b  
655 (Novagen), which added a N-terminal His<sub>6</sub>-tag. The syn3.0 NadD-YqeK gene was synthesized  
656 by Genscript. The YqeK domain was cloned into NdeI und XhoI restriction sites of pET28 after  
657 PCR amplification using primers synYqeK-Fw\_NdeI and synYqeK-Rv\_XhoI STOP, which adds  
658 a N-terminal His-Tag. The YqeK domain was cloned into NdeI und XhoI restriction sites of  
659 pET28 after PCR amplification using primers synYqeK-Fw\_NdeI and synYqeK-Rv\_XhoI STOP,  
660 which adds a N-terminal His-Tag. The JCVIJCVISYN3A\_0380 H230A mutant was made by site  
661 directed mutagenesis, using primers H230AFor/H230ARev to change the CAC codon (His) to  
662 GCC (Ala), using Phusion polymerase. JCVISYN3A\_0400 was cloned between the NdeI and  
663 BamHI sites of bacterial expression vector pET15b after PCR amplification from pUC19-400  
664 using primers DH611 and DH612. All constructs were verified by Sanger sequencing.

665

### 666 **Mutation frequency assays for *E. coli* derivatives**

667 Overnight cultures in LB with added antibiotics and arabinose (0.02%) were diluted 100-fold in  
668 the same conditions and grown for another 24 h before dilutions were plated on LB and LB  
669 rifampicin (25 µg/ml) to calculate a mutation ratio (Number of colonies on Rif x dilution factor) /  
670 (Number of colonies on LB x dilution factor) .

671

### 672 **Protein expression and purification and enzyme assays**

673 All characterized JCVI-syn3A encoded proteins were expressed as His-tagged variants in *E. coli*  
674 and purified using Ni<sup>2+</sup>-NTA columns as described in Supplemental Methods. In vitro activity  
675 assays for CoA disulfide reductase, for phosphatase with a range of substrates, NadD,  
676 glyoxalase, and deglycase are described in detail in Supplemental Methods.

677 **Acknowledgements.** This work was funded by the National Science Foundation (Grants MCB  
678 1611846 to OF, MCB-1611952 to CH and MCB-1611711 to ADH and V dC-L, MCB 1840301,  
679 MCB 1840320 and MCB 1818344 subcontracts to J.I.G.) and by the J. Craig Venter Institute.

680

681

682

683 **Table 1. Members of the HAD family of unknown function encoded by JCVI-Syn3**

| Gene           | Family                                                  | Essential | Best 3 substrates<br>Activity <i>in vitro</i> *                               | Physical clustering                                                     | <i>M. florum</i> ortholog<br>locus tag and<br>essentiality** |
|----------------|---------------------------------------------------------|-----------|-------------------------------------------------------------------------------|-------------------------------------------------------------------------|--------------------------------------------------------------|
| JCVISYN3A_0066 | Cof subfamily of IIB<br>subfamily of HAD<br>superfamily | no        | pNPP, FMN,<br>CoA                                                             | Between 5S rRNA gene<br>and thioredoxin                                 | Mfl169 (NE)                                                  |
| JCVISYN3A_0077 | Cof-like hydrolase, HAD<br>superfamily                  | no        | Fru-1P, Ery-4P                                                                | Between <i>tsaD</i> and <i>aspS</i>                                     | Mfl614 (E)                                                   |
| JCVISYN3A_0710 | Cof subfamily of IIB<br>subfamily of HAD<br>superfamily | yes       | Could not clone                                                               | Between tRNA genes<br>and predicted<br>phosphonate transporter<br>genes | Mfl513 (E)                                                   |
| JCVISYN3A_0728 | HAD superfamily<br>hydrolase subfamily IIB,<br>protein  | no        | GMP<br>XMP<br>2-deoxy-glucose-<br>6P                                          | Between glycolysis<br>genes                                             | Mfl503 (E)                                                   |
| JCVISYN3A_0907 | Cof-like hydrolase, HAD<br>superfamily                  | no        | N-acetyl-D-<br>glucosamine-6P<br>Fructose-1P<br>N-acetyl-D-<br>glucosamine-1P | Between YidC and<br>choline kinase-like                                 | Mfl680 (NE)                                                  |

684 \*Abbreviations in Table S1; \*\* (E), essential; (NE)=non-essential in *M. florum*

685

686

687 **References**

- 688 1. Schwille,P. (2011) Bottom-up synthetic biology: engineering in a tinkerer’s world. *Science*,  
689 **333**, 1252–1254.
- 690 2. Hutchison,C.A., Chuang,R.-Y., Noskov,V.N., Assad-Garcia,N., Deerinck,T.J., Ellisman,M.H.,  
691 Gill,J., Kannan,K., Karas,B.J., Ma,L., *et al.* (2016) Design and synthesis of a minimal  
692 bacterial genome. *Science*, **351**, aad6253.
- 693 3. Breuer,M., Earnest,T.M., Merryman,C., Wise,K.S., Sun,L., Lynott,M.R., Hutchison,C.A.,  
694 Smith,H.O., Lapek,J.D., Gonzalez,D.J., *et al.* (2019) Essential metabolism for a minimal  
695 cell. *Elife*, **8**, e36842.
- 696 4. Danchin,A. and Fang,G. (2016) Unknown unknowns: essential genes in quest for function.  
697 *Microb. Biotechnol.*, **9**, 530–540.
- 698 5. Antczak,M., Michaelis,M. and Wass,M.N. (2019) Environmental conditions shape the nature  
699 of a minimal bacterial genome. *Nat. Commun.*, **10**, 3100.
- 700 6. Linster,C.L., Van Schaftingen,E. and Hanson,A.D. (2013) Metabolite damage and its repair or  
701 pre-emption. *Nat. Chem. Biol.*, **9**, 72–80.
- 702 7. Lerma-Ortiz,C., Jeffryes,J.G., Cooper,A.J.L., Niehaus,T.D., Thamm,A.M.K., Frelin,O.,  
703 Aunins,T., Fiehn,O., de Crécy-Lagard,V., Henry,C.S., *et al.* (2016) ‘Nothing of chemistry  
704 disappears in biology’: the Top 30 damage-prone endogenous metabolites. *Biochem. Soc.*  
705 *Trans.*, **44**, 961–71.
- 706 8. de Crécy-Lagard,V., Haas,D. and Hanson,A.D. (2018) Newly-discovered enzymes that  
707 function in metabolite damage-control. *Curr. Opin. Chem. Biol.*, **47**, 101–108.
- 708 9. Becker-Ketterer,J., Paczia,N., Conrotte,J.F., Zhu,C., Fiehn,O., Jung,P.P., Steinmetz,L.M. and  
709 Linster,C.L. (2018) NAD(P)HX repair deficiency causes central metabolic perturbations in  
710 yeast and human cells. *FEBS J.*, **285**, 3376–3401.
- 711 10. Van Schaftingen,E., Rzem,R., Marbaix,A., Collard,F., Veiga-Da-Cunha,M. and Linster,C.L.  
712 (2013) Metabolite proofreading, a neglected aspect of intermediary metabolism. *J. Inherit.*  
713 *Metab. Dis.*, **36**, 427–434.
- 714 11. Veiga-da-Cunha,M., Van Schaftingen,E. and Bommer,G.T. (2020) Inborn errors of  
715 metabolite repair. *J. Inherit. Metab. Dis.*, **43**, 14–24.
- 716 12. Sun,J., Jeffryes,J.G., Henry,C.S., Bruner,S.D. and Hanson,A.D. (2017) Metabolite damage

- 717 and repair in metabolic engineering design. *Metab. Eng.*, **44**, 150–159.
- 718 13. Hanson,A.D., Henry,C.S., Fiehn,O. and de Crécy-Lagard,V. (2016) Metabolite Damage and  
719 Metabolite Damage Control in Plants. *Annu. Rev. Plant Biol.*, **67**, 131–52.
- 720 14. Stover,P. and Schirch,V. (1990) Serine hydroxymethyltransferase catalyzes the hydrolysis of  
721 5,10-methenyltetrahydrofolate to 5-formyltetrahydrofolate. *J. Biol. Chem.* , **265**, 14227–  
722 14233.
- 723 15. Stover,P. and Schirch,V. (1993) The metabolic role of leucovorin. *Trends Biochem. Sci.*, **18**,  
724 102–106.
- 725 16. Jeanguenin,L., Lara-Núñez,A., Pribat,A., Hamner Mageroy,M., Gregory 3rd,J.F., Rice,K.C.,  
726 de Crécy-Lagard,V. and Hanson,A.D. (2010) Moonlighting glutamate  
727 formiminotransferases can functionally replace 5-formyltetrahydrofolate cycloligase. *J.*  
728 *Biol. Chem.*, **285**, 41557–66.
- 729 17. Poole,L.B. (2015) The basics of thiols and cysteines in redox biology and chemistry. *Free*  
730 *Radic. Biol. Med.*, **80**, 148–57.
- 731 18. Berglund,O. and Holmgren,A. (1975) Thioredoxin reductase-mediated hydrogen transfer  
732 from *Escherichia coli* thioredoxin-(SH)<sub>2</sub> to phage T4 thioredoxin-S<sub>2</sub>. *J. Biol. Chem.*, **250**,  
733 2778–2782.
- 734 19. Thelander,L. (1967) Thioredoxin Reductase: Characterization of a homogeneous preparation  
735 from *Escherichia coli* B. *J. Biol. Chem.*, **242**, 852–859.
- 736 20. Holmgren,A. (1985) Thioredoxin. *Annu. Rev. Biochem.*, **54**, 237–271.
- 737 21. Ben-Menachem,G., Himmelreich,R., Herrmann,R., Aharonowitz,Y. and Rottem,S. (1997)  
738 The thioredoxin reductase system of mycoplasmas. *Microbiology*, **143**, 1933–1940.
- 739 22. Thelander,L. and Reichard,P. (1979) Reduction of Ribonucleotides. *Annu. Rev. Biochem.*, **48**,  
740 133–158.
- 741 23. DelCardayré,S.B., Stock,K.P., Newton,G.L., Fahey,R.C. and Davies,J.E. (1998) Coenzyme  
742 A disulfide reductase, the primary low molecular weight disulfide reductase from  
743 *Staphylococcus aureus* : purification and characterization of the native enzyme. *J. Biol.*  
744 *Chem.*, **273**, 5744–5751.
- 745 24. Benyoucef,M., Rigaud,J.-L. and Leblanc,G. (1981) The electrochemical proton gradient in  
746 *Mycoplasma* cells. *Eur. J. Biochem.*, **113**, 491–498.
- 747 25. Seifried,A., Schultz,J. and Gohla,A. (2013) Human HAD phosphatases: structure,



- 748 mechanism, and roles in health and disease. *FEBS J.*, **280**, 549–571.
- 749 26. Lachance,J.-C., Matteau,D., Brodeur,J., Lloyd,C.J., Mih,N., King,Z.A., Knight,T.F.,  
750 Feist,A.M., Monk,J.M., Palsson,B.O., *et al.* (2021) Genome-scale metabolic modeling  
751 reveals key features of a minimal gene set. *Mol. Syst. Biol.*, **17**, e10099–e10099.
- 752 27. Papenfort,K., Sun,Y., Miyakoshi,M., Vanderpool,C.K. and Vogel,J. (2013) Small RNA-  
753 mediated activation of sugar phosphatase mRNA regulates glucose homeostasis. *Cell*, **153**,  
754 426–437.
- 755 28. Huang,L., Khusnutdinova,A., Nocek,B., Brown,G., Xu,X., Cui,H., Petit,P., Flick,R.,  
756 Zallot,R., Balmant,K., *et al.* (2016) A family of metal-dependent phosphatases implicated in  
757 metabolite damage-control. *Nat. Chem. Biol.*, **12**.
- 758 29. Aravind,L. and Koonin,E. V. (1998) The HD domain defines a new superfamily of metal-  
759 dependent phosphohydrolases. *Trends Biochem. Sci.*, **23**, 469–72.
- 760 30. Minazzato,G., Gasparrini,M., Amici,A., Cianci,M., Mazzola,F., Orsomando,G., Sorci,L. and  
761 Raffaelli,N. (2020) Functional characterization of COG1713 (YqeK) as a novel diadenosine  
762 tetraphosphate hydrolase family. *J. Bacteriol.*, **202**, e00053-20.
- 763 31. Seaver,S.M.D., Liu,F., Zhang,Q., Jeffryes,J., Faria,J.P., Edirisinghe,J.N., Mundy,M.,  
764 Chia,N., Noor,E., Beber,M.E., *et al.* (2020) The ModelSEED Biochemistry Database for the  
765 integration of metabolic annotations and the reconstruction, comparison and analysis of  
766 metabolic models for plants, fungi and microbes. *Nucleic Acids Res.*, **49**, D1555.
- 767 32. Kanehisa,M. and Goto,S. (2000) KEGG: kyoto encyclopedia of genes and genomes. *Nucleic*  
768 *Acids Res.*, **28**, 27–30.
- 769 33. Krieger,C.J., Zhang,P., Mueller,L.A., Wang,A., Paley,S., Arnaud,M., Pick,J., Rhee,S.Y. and  
770 Karp,P.D. (2004) MetaCyc: a multiorganism database of metabolic pathways and enzymes.  
771 *Nucleic Acids Res.*, **32**, D438-42.
- 772 34. Jeffryes,J.G., Colastani,R.L., Elbadawi-Sidhu,M., Kind,T., Niehaus,T.D., Broadbelt,L.J.,  
773 Hanson,A.D., Fiehn,O., Tyo,K.E.J. and Henry,C.S. (2015) MINEs: Open access databases  
774 of computationally predicted enzyme promiscuity products for untargeted metabolomics. *J.*  
775 *Cheminform.*, **7**, 44.
- 776 35. Hatzimanikatis,V., Li,C., Ionita,J.A., Henry,C.S., Jankowski,M.D. and Broadbelt,L.J. (2005)  
777 Exploring the diversity of complex metabolic networks. *Bioinformatics*, **21**, 1603–9.
- 778 36. Henry,C.S., Broadbelt,L.J. and Hatzimanikatis,V. (2010) Discovery and analysis of novel

- 779 metabolic pathways for the biosynthesis of industrial chemicals: 3-hydroxypropanoate.  
780 *Biotechnol. Bioeng.*, **106**, 462–73.
- 781 37. Weinert,B.T., Iesmantavicius,V., Wagner,S.A., Schözl,C., Gummesson,B., Beli,P.,  
782 Nyström,T. and Choudhary,C. (2013) Acetyl-phosphate is a critical determinant of lysine  
783 acetylation in *E. coli*. *Mol. Cell*, **51**, 265–272.
- 784 38. Phillips,S.A. and Thornalley,P.J. (1993) The formation of methylglyoxal from triose  
785 phosphates. *Eur. J. Biochem.*, **212**, 101–105.
- 786 39. Sukdeo,N. and Honek,J.F. (2008) Microbial glyoxalase enzymes: Metalloenzymes  
787 controlling cellular levels of methylglyoxal. *Drug Metabol. Drug Interact.*, **23**, 29–50.
- 788 40. Inoue,Y. and Kimura,A. (1995) Methylglyoxal and regulation of its metabolism in  
789 microorganisms. *Adv. Microb. Physiol.*, **37**, 177-227.
- 790 41. Misra,K., Banerjee,A.B., Ray,S. and Ray,M. (1996) Reduction of methylglyoxal in  
791 *Escherichia coli* K12 by an aldehyde reductase and alcohol dehydrogenase. *Mol. Cell.*  
792 *Biochem.*, **156**, 117–24.
- 793 42. Jagt,D.L.V., Robinson,B., Taylor,K.K. and Hunsaker,L.A. (1992) Reduction of trioses by  
794 NADPH-dependent aldo-keto reductases. Aldose reductase, methylglyoxal, and diabetic  
795 complications. *J. Biol. Chem.*, **267**, 4364–9.
- 796 43. Smith,N. and Wilson,M.A. (2017) Structural biology of the DJ-1 superfamily. *Adv. Exp.*  
797 *Med. Biol.*, **1037**, 5–24.
- 798 44. Richarme,G., Liu,C., Mihoub,M., Abdallah,J., Leger,T., Joly,N., Liebart,J.-C., Jurkunas,U.  
799 V, Nadal,M., Bouloc,P., *et al.* (2017) Guanine glycation repair by DJ-1/Park7 and its  
800 bacterial homologs. *Science*, **357**, 208–211.
- 801 45. Lee,C., Lee,J., Lee,J.Y. and Park,C. (2015) Characterization of the *Escherichia coli* Yajl,  
802 Yhbo and Elbb glyoxalases. *FEMS Microbiol. Lett.*, **363**, fmv239.
- 803 46. Matsuda,N., Kimura,M., Queliconi,B.B., Kojima,W., Mishima,M., Takagi,K., Koyano,F.,  
804 Yamano,K., Mizushima,T., Ito,Y., *et al.* (2017) Parkinson’s disease-related DJ-1 functions  
805 in thiol quality control against aldehyde attack in vitro. *Sci. Rep.*, **7**, 12816.
- 806 47. Clugston,S.L., Barnard,J.F.J., Kinach,R., Miedema,D., Ruman,R., Daub,E. and Honek,J.F.  
807 (1998) Overproduction and characterization of a dimeric non-zinc glyoxalase I from  
808 *Escherichia coli*: Evidence for optimal activation by nickel ions. *Biochemistry*, **37**, 8754–  
809 63.

- 810 48. Choi,D., Kim,J., Ha,S., Kwon,K., Kim,E.H., Lee,H.Y., Ryu,K.S. and Park,C. (2014)  
811 Stereospecific mechanism of DJ-1 glyoxalases inferred from their hemithioacetal-  
812 containing crystal structures. *FEBS J.*, **281**, 5447–62.
- 813 49. Richarme,G., Abdallah,J., Mathas,N., Gautier,V. and Dairou,J. (2018) Further  
814 characterization of the Maillard deglycase DJ-1 and its prokaryotic homologs, deglycase  
815 1/Hsp31, deglycase 2/YhbO, and deglycase 3/YajL. *Biochem. Biophys. Res. Commun.*, **503**,  
816 703–709.
- 817 50. Van Schaftingen,E., Veiga-da-Cunha,M. and Linster,C.L. (2015) Enzyme complexity in  
818 intermediary metabolism. *J. Inherit. Metab. Dis.*, **38**, 721–727.
- 819 51. Golubev,A., Hanson,A.D. and Gladyshev,V.N. (2017) Non-enzymatic molecular damage as  
820 a prototypic driver of aging. *J. Biol. Chem.* , **292**, 6029–6038.
- 821 52. Altschul,S.F., Madden,T.L., Schaffer,A.A., Zhang,J., Zhang,Z., Miller,W. and Lipman,D.J.  
822 (1997) Gapped BLAST and PSI-BLAST: a new generation of protein database search  
823 programs. *Nucleic Acids Res.*, **25**, 3389–3402.
- 824 53. Database resources of the National Center for Biotechnology Information (2018) *Nucleic*  
825 *Acids Res.*, **46**, D8–D13.
- 826 54. Li,W., Cowley,A., Uludag,M., Gur,T., McWilliam,H., Squizzato,S., Park,Y.M., Buso,N. and  
827 Lopez,R. (2015) The EMBL-EBI bioinformatics web and programmatic tools framework.  
828 *Nucleic Acids Res.*, **43**, W580-4.
- 829 55. Corpet,F. (1988) Multiple sequence alignment with hierarchical clustering. *Nucleic Acids*  
830 *Res.*, **16**, 10881–10890.
- 831 56. Overbeek,R., Olson,R., Pusch,G.D., Olsen,G.J., Davis,J.J., Disz,T., Edwards,R.A., Gerdes,S.,  
832 Parrello,B., Shukla,M., *et al.* (2014) The SEED and the Rapid Annotation of microbial  
833 genomes using Subsystems Technology (RAST). *Nucleic Acids Res.*, **42**, D206-14.
- 834 57. Harrison,K.J., de Crécy-Lagard,V. and Zallot,R. (2018) Gene Graphics: A genomic  
835 neighborhood data visualization web application. *Bioinformatics*, **34**, 1406–1408.
- 836 58. Tamura,K., Stecher,G., Peterson,D., Filipowski,A. and Kumar,S. (2013) MEGA6: Molecular  
837 Evolutionary Genetics Analysis version 6.0. *Mol. Biol. Evol.*, **30**, 2725–2729.
- 838 59. Henry,C.S., Broadbelt,L.J. and Hatzimanikatis,V. (2007) Thermodynamics-based metabolic  
839 flux analysis. *Biophys. J.*, **92**, 1792–1805.
- 840 60. Honjo,M., Furukawa,Y., Moriyama,H. and Tanaka,K. (1963) Synthesis of nicotinamide

- 841 adenine dinucleotide analogs and their coenzymatic activities. *Chem. Pharm. Bull. (Tokyo)*,  
842 **11**, 712–720.
- 843 61. McLaren, J., Ngo, D.T.C. and Olivera, B.M. (1973) Pyridine Nucleotide Metabolism in  
844 *Escherichia coli*: III. Biosynthesis from alternative precursors in vivo. *J. Biol. Chem.*, **248**,  
845 5144–5149.
- 846 62. Sambrook, J.E., Fritsch, E.F., Maniatis, T., Fritsch, E.F., Sambrook, J.E., Fritsch, E.F.,  
847 Maniatis, T., Fritsch, F. and Maniatis, T. (1989) *Molecular Cloning: A Laboratory Manual*  
848 Cold Spring Harbor Laboratory Press, Cold Spring Harbor.
- 849 63. Miller, J.H. (1972) *Experiments in Molecular Genetics* Cold Spring Harbor Laboratory Press,  
850 Cold Spring Harbor, NY.
- 851 64. Cherepanov, P.P. and Wackernagel, W. (1995) Gene disruption in *Escherichia coli*: TcR and  
852 KmR cassettes with the option of Flp-catalyzed excision of the antibiotic-resistance  
853 determinant. *Gene*, **158**, 9–14.
- 854 65. Tully, J.G., Rose, D.L., Whitcomb, R.F. and Wenzel, R.P. (1979) Enhanced isolation of  
855 *Mycoplasma pneumoniae* from throat washings with a newly modified culture medium. *J.*  
856 *Infect. Dis.*, **139**, 478–482.
- 857 66. Kannan, K., Tsvetanova, B., Chuang, R.-Y., Noskov, V.N., Assad-Garcia, N., Ma, L., Hutchison  
858 Iii, C.A., Smith, H.O., Glass, J.I., Merryman, C., *et al.* (2016) One step engineering of the  
859 small-subunit ribosomal RNA using CRISPR/Cas9. *Sci. Rep.*, **6**, 30714.
- 860 67. Tsarmopoulos, I., Gourgues, G., Blanchard, A., Vashee, S., Jores, J., Lartigue, C. and Sirand-  
861 Pugnet, P. (2016) In-yeast engineering of a bacterial genome using CRISPR/Cas9. *ACS*  
862 *Synth. Biol.*, **5**, 104–109.
- 863 68. Lartigue, C., Glass, J.I., Alperovich, N., Pieper, R., Parmar, P.P., Hutchison, C.A., Smith, H.O.  
864 and Venter, J.C. (2007) Genome transplantation in bacteria: changing one species to another.  
865 *Science*, **317**, 632–638.
- 866 69. Lartigue, C., Vashee, S., Algire, M.A., Chuang, R.-Y., Benders, G.A., Ma, L., Noskov, V.N.,  
867 Denisova, E.A., Gibson, D.G., Assad-Garcia, N., *et al.* (2009) Creating bacterial strains from  
868 genomes that have been cloned and engineered in yeast. *Science*, **325**, 1693–1696.  
869  
870

871 **Figure legends**

872 **Figure 1. 5-FCL activity is encoded by JCVI\_0400.** (A) Enzymatic source and repair of 5-  
873 CHO-THF. (B) Growth phenotype of a WT *E. coli* BW25113,  $\Delta ygfA$  mutant and,  $\Delta ygfA$   
874 mutant expressing JCVI\_0443 gene on M9 minimal medium (0.4% glucose) with (1) 20 mM  
875  $\text{NH}_4\text{Cl}$  or (2) 50 mM glycine as sole nitrogen source. Plates were incubated for 3 days at 37°C.  
876

877 **Figure 2. Predicted and validated redox buffering systems in JCVI-Syn3.** (A) Candidates for  
878  $\text{H}_2\text{O}_2$  detoxification systems of JCVI3, experimentally validated are in solid arrows, only the  
879 number of the locus tags are given, P is for protein, R is for small molecule. (B) CoADR  
880 Michaelis-Menten saturation curve for the determination of the  $K_m$  and  $k_{cat}$  for CoAD  
881 consumption. (C) CoADR is specific towards oxidized CoA with no activity towards other tested  
882 disulfides  
883

884 **Figure 3. Heatmap including 15 metabolites from JCVI-syn3A mutant metabolomic**  
885 **analysis with highest VIP scores.** Samples and genotypes are represented in columns. High  
886 intensity measurements as compared to average intensity are red/yellow, and low intensity  
887 measurements are represented by green/blue  
888

889 **Figure 4. Predicted Hydrolase of unknown function is clustered or fused to NadD in many**  
890 **Firmicutes** (A) Predicted  $\text{NADP}^+$  synthesis pathway in JCVI-Syn3. (B) Physical clustering and  
891 fusions of *nadD* and *ykeK* homologs in several gram-positive Bacteria. The RefSeq identifiers  
892 for the *yqeK* genes used in descending order are: NP\_975428.1, NP\_390441.1, NP\_372117.1,  
893 NP\_816490.1, YP\_140036.1. (C) Docked model of 2-deoxy-NaAD bound to the C.  
894 *acetobutylicum* YqeK (pdb code: 3CCG). The protein is shown in ribbon format (grey) with side  
895 chains as lines, two iron atoms are shown as spheres bound to the diphosphate of  
896 dNaAD. Tyrosine 82 (green) is modeled as two conformations in the crystal structure and forms  
897 a close interaction with the 2' carbon of dNaAD.  
898

899 **Figure 5. Biochemical analysis of the NadD and YqeK activities** (A) Relative reaction rates of  
900 *Bacillus subtilis* and JCVI syn3.0 NadD enzymes with NaMN and various nucleotides,  
901 calculated as percentage of the canonical reaction with ATP for each NadD enzyme. Enzymes

902 were incubated with 2 mM NTP, 0.5 mM NaMN, 4 mM MgCl<sub>2</sub> and 5 u/ml yeast inorganic  
903 pyrophosphatase for 5 min at 37° C. H230A has the conserved H in the active site of the YqeK  
904 domain mutated to ablate the HD activity and cleavage of nucleotides. **(B)** Activity of the  
905 expressed JCVI syn3.0 YqeK domain with different substrates. YqeK (0.2 µg) was incubated  
906 with 0.5 or 0.05 mM substrates, 1 mg/ml BSA and 2.0 mM MgCl<sub>2</sub> for 20 min at at 37° C. Black  
907 bars are data for 0.5 mM substrates, white bars are data for 0.05 mM substrates. **(C)** Mutation  
908 ratio on LB rifampicin for strain  $\Delta mutT$  with empty vector (pBAD24),  $\Delta mutT$  with *E. coli mutT*  
909 in trans,  $\Delta mutT$  with either the *nadD-yqeK* fusion gene JCVI\_0380, or the *nadD* or *yqeK*  
910 domains alone. \*\*\* indicates a P-value <0.001 with experiments performed with four biological  
911 replicates and four technical replicates.

912  
913 **Figure 6.** Generation of compounds matching observed peaks (blue line) or ModelSEED  
914 compounds (green line) with each iteration of the PickAxe algorithm. Note, multiple compounds  
915 can match the same peak if they are stereo isomers.

916  
917 **Figure 7. Map of predicted extensions to the JCVI-syn3 model to push flux through as**  
918 **many observed peaks as possible.** Grey reactions are inactive model reactions; purple reactions  
919 are active model reactions; green indicates active ModelSEED reactions; red indicates active  
920 predicted damage reactions; and blue indicates active predicted enzymatic reactions. All active  
921 predicted spontaneous reactions and nearly all active model reactions are shown on the map;  
922 some ModelSEED and predicted enzymatic reactions are excluded. The insets highlight  
923 examples of promiscuous carbohydrate chemistry (A), prevalence of amino acid acetylation (B),  
924 and spontaneous reactions mediated by the damage- causing metabolite methylglyoxal.

925  
926 **Figure 8. Distribution of predicted and metabolomics-associated reactions generated by**  
927 **spontaneous reaction rules.** The orange bars in the chart show the relative number of reactions  
928 generated by each spontaneous reaction rule in the full PickAxe expansion of the JCVI-syn3  
929 model. The gray bars show the relative number reactions generated by the same reaction rules  
930 that were actually used to generate observed metabolites in the JCVI-syn3 strain by the metabo-  
931 FBA analysis. To permit side-by-side comparison, the reaction counts are normalized by the  
932 number of reactions associated with the most prevalent reaction rule in each set. The differences

933 in the distributions highlight how the most promiscuous reaction rules (highest orange bars) are  
934 not necessarily the most impactful on cell chemistry (highest gray bars).

935

936 **Figure 9. Characterization of JCVI\_0400.** (A) Growth of WT,  $\Delta yajL$ ,  $\Delta yajL \Delta hchA$ ,  $\Delta yajL$   
937  $\Delta hchA$  with *hchA* in trans and  $\Delta yajL \Delta hchA$  with JCVI\_0400 in trans. pUC19 was used as  
938 empty vector. Each strain was tested in 5 replicates. Plates were incubated 2 days at 37°C in LB  
939 with agitation in a Bioscreen C device. (B) Methylglyoxalase activity of JCV\_0400 (MP DJ-1)  
940 compared to human DJ-1 (HsDj1) and yeast Hsp31. Conversion of methylglyoxal to L-lactate  
941 was measured in a coupled assay with L-lactate oxidase and Amplex red. JCVIsyn3\_0400 is a  
942 weak methylglyoxalase. Hsp31 produces racemic lactate, so the measured  $k_{obs}$  is  $\sim 1/2$  the true  
943 rate and is higher than either close DJ-1 homolog.

944



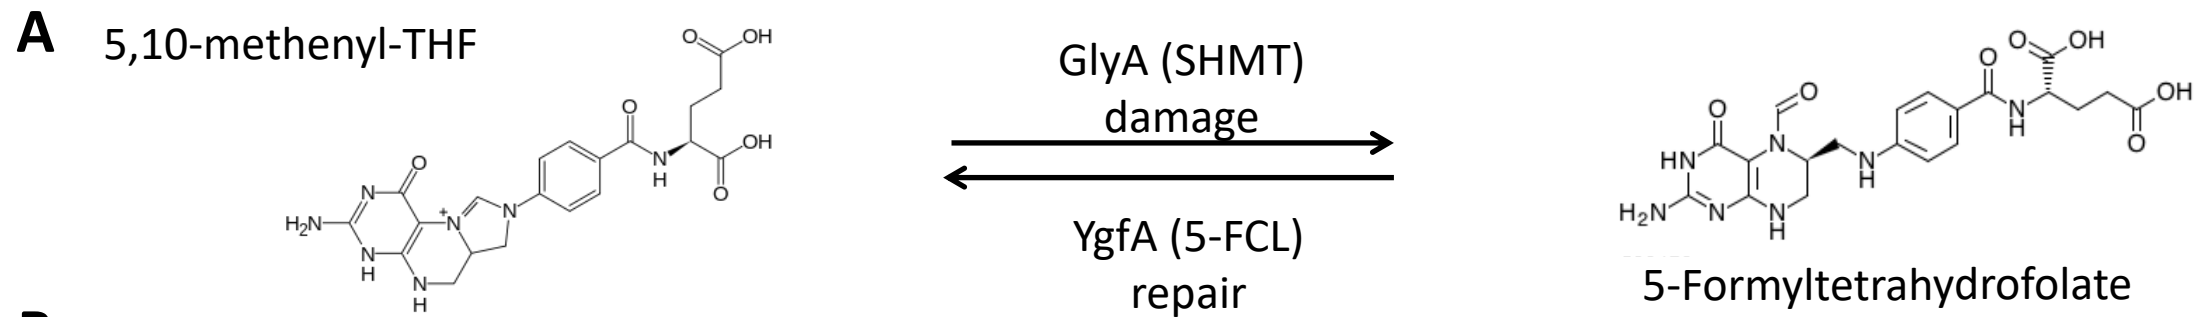**B**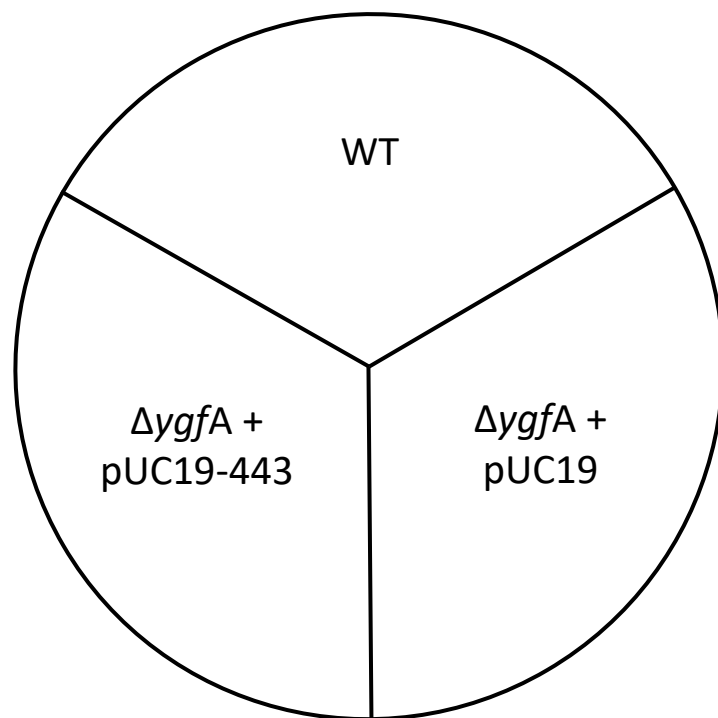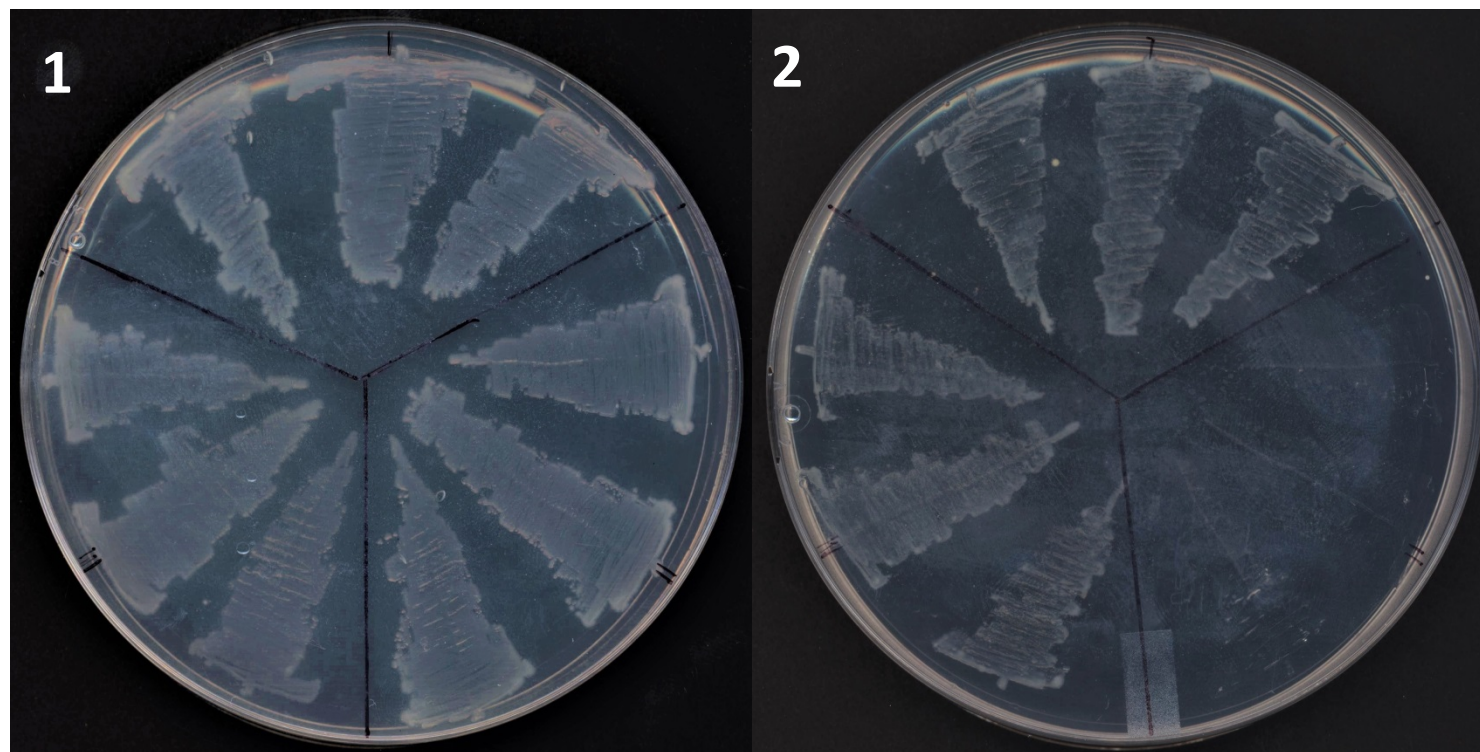

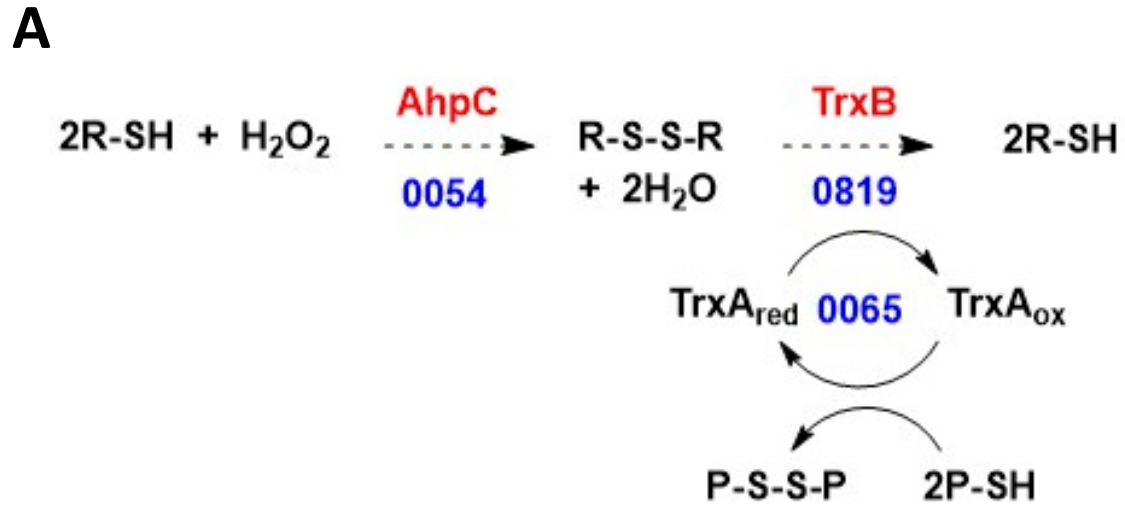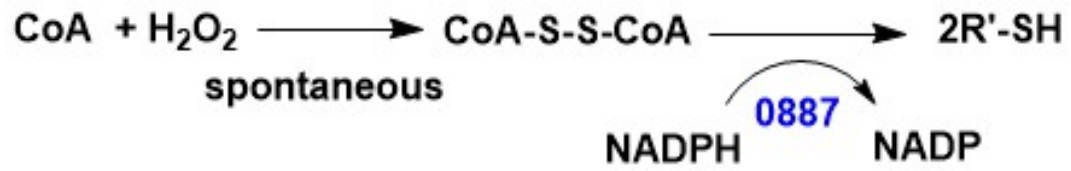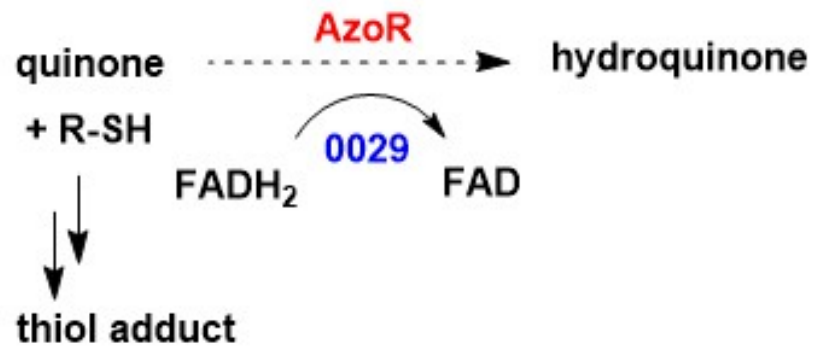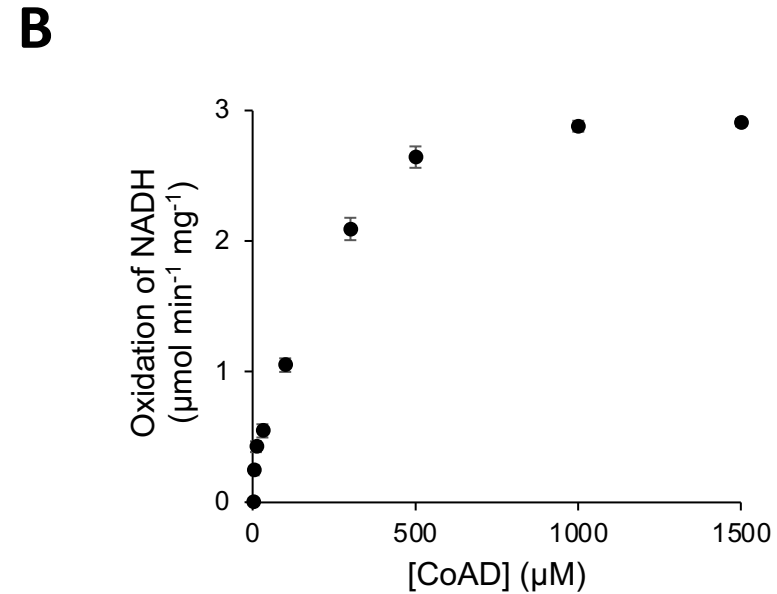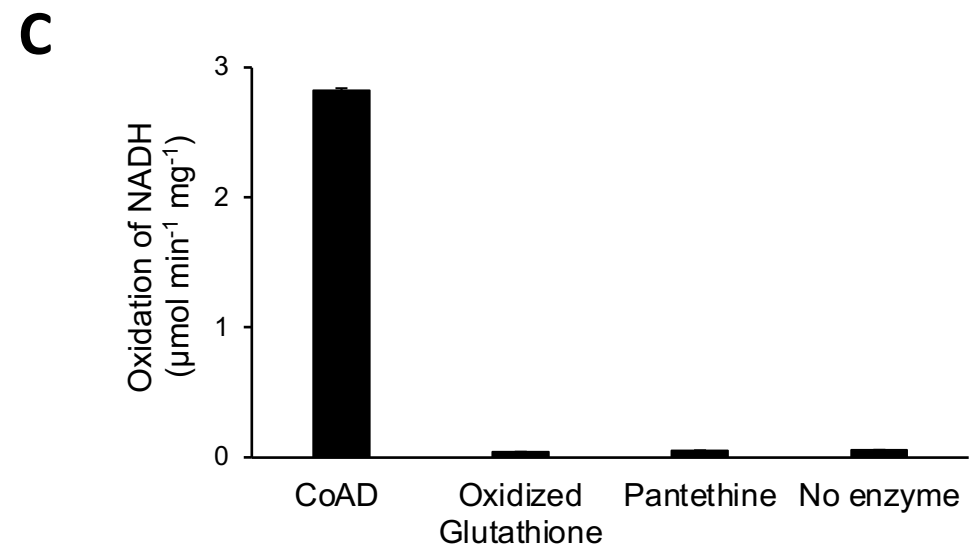

Figure 3

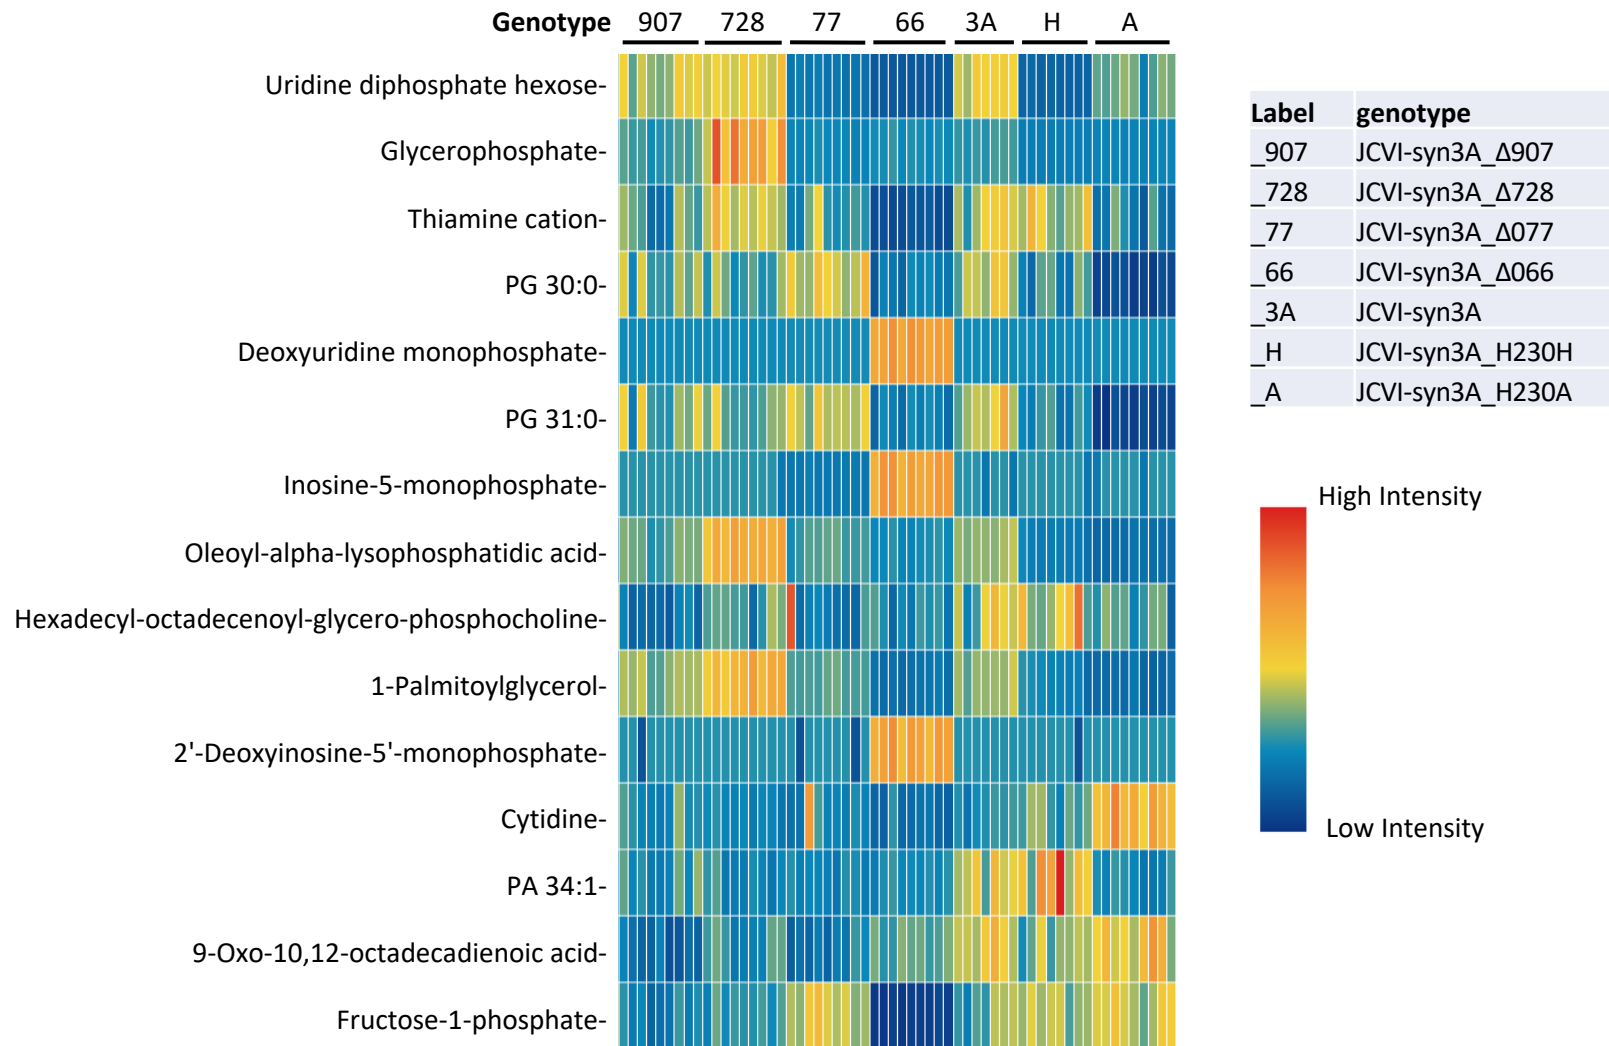

Figure 4

A

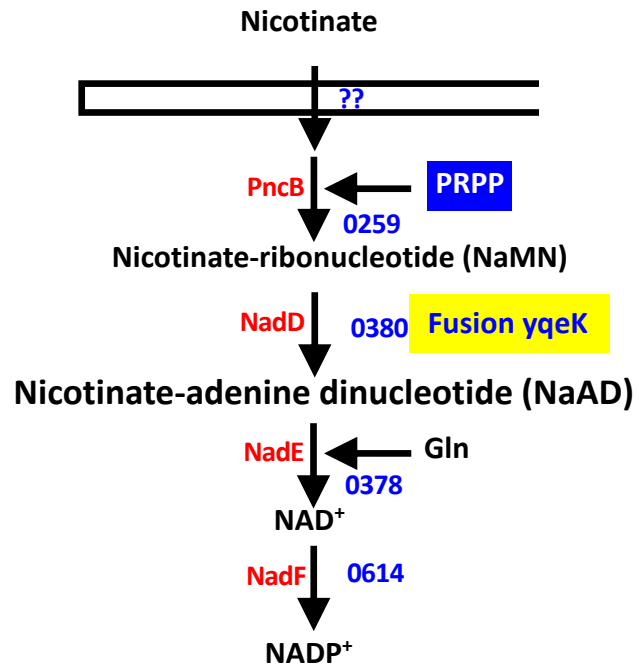

B

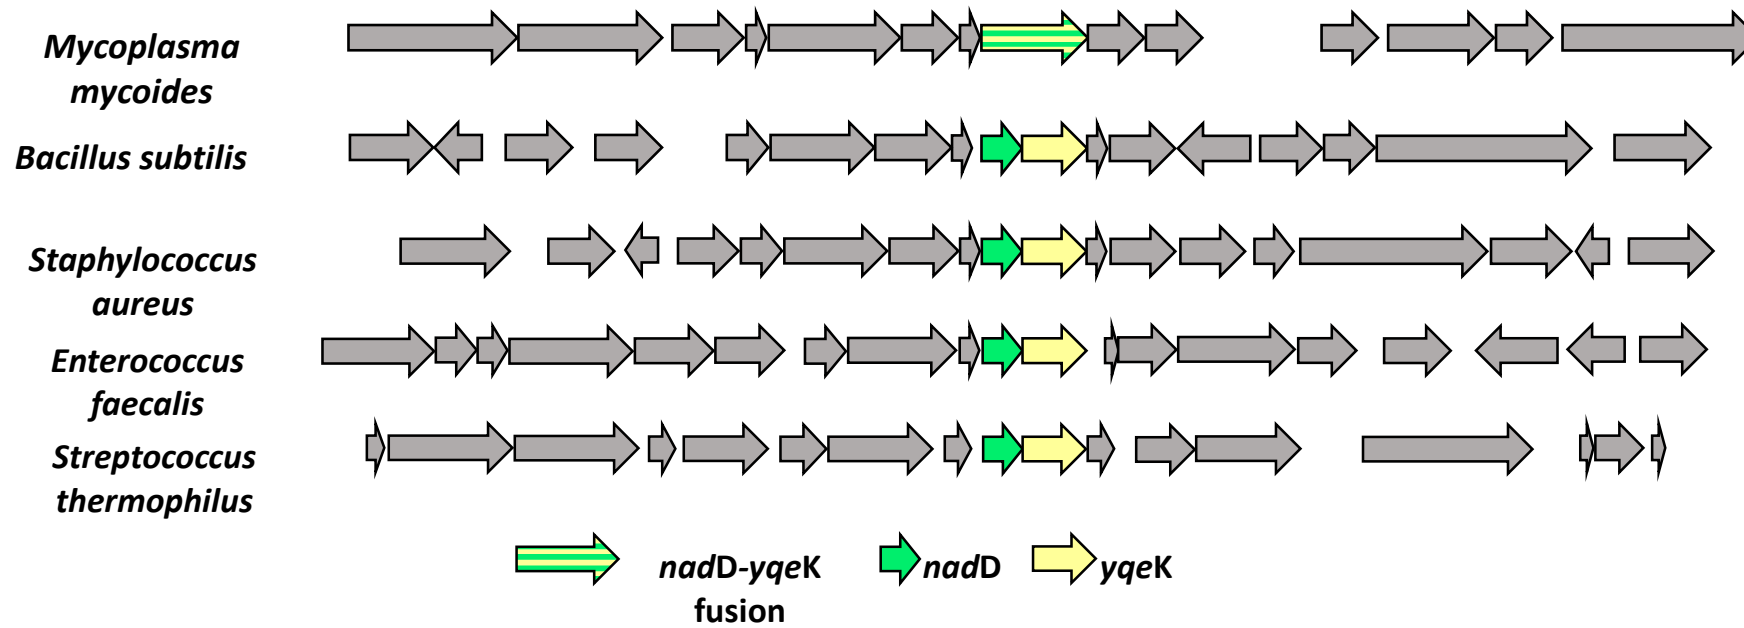

A

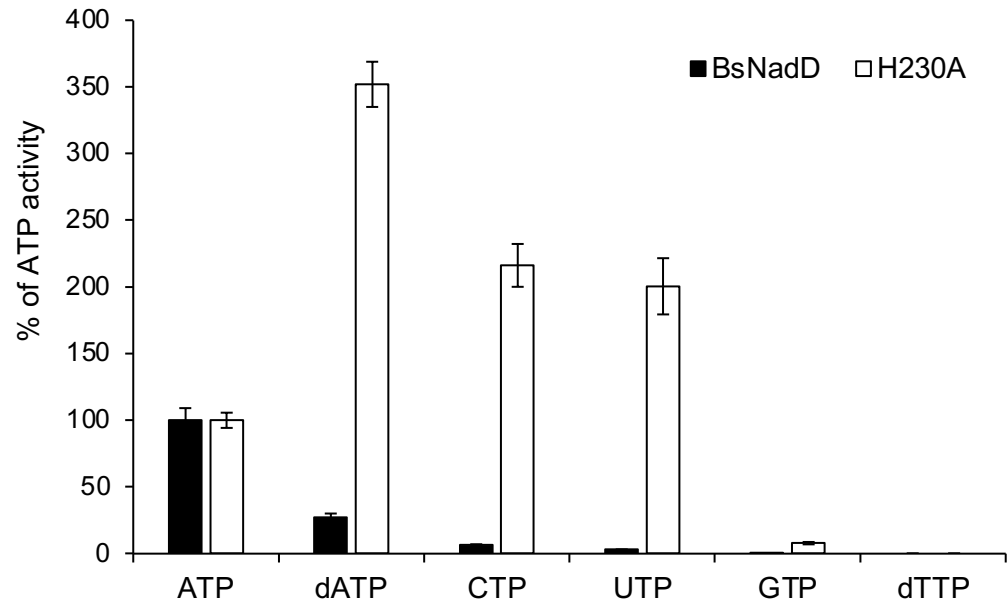

B

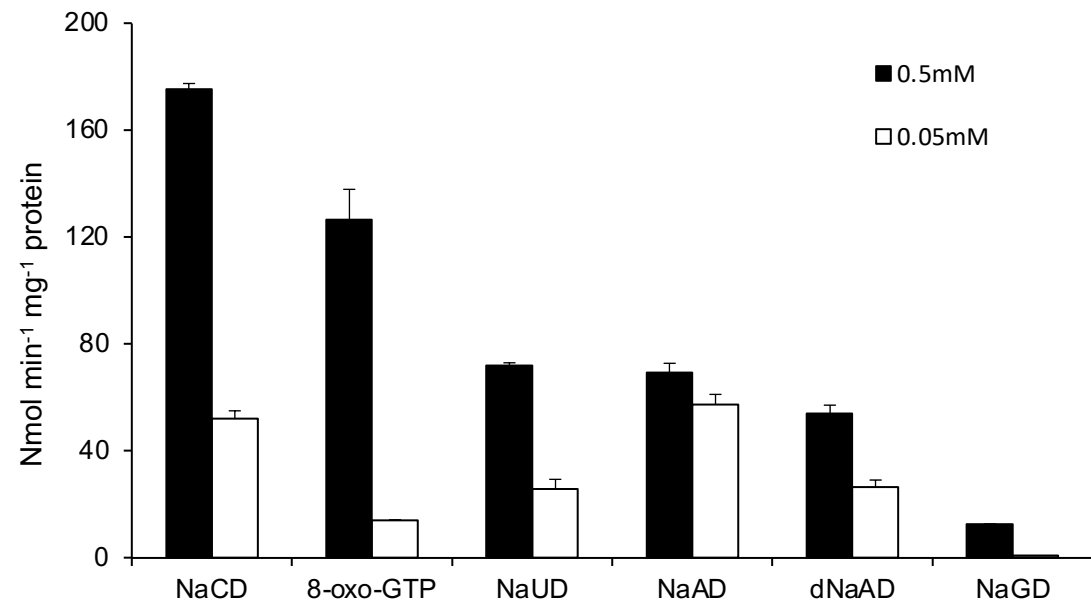

C

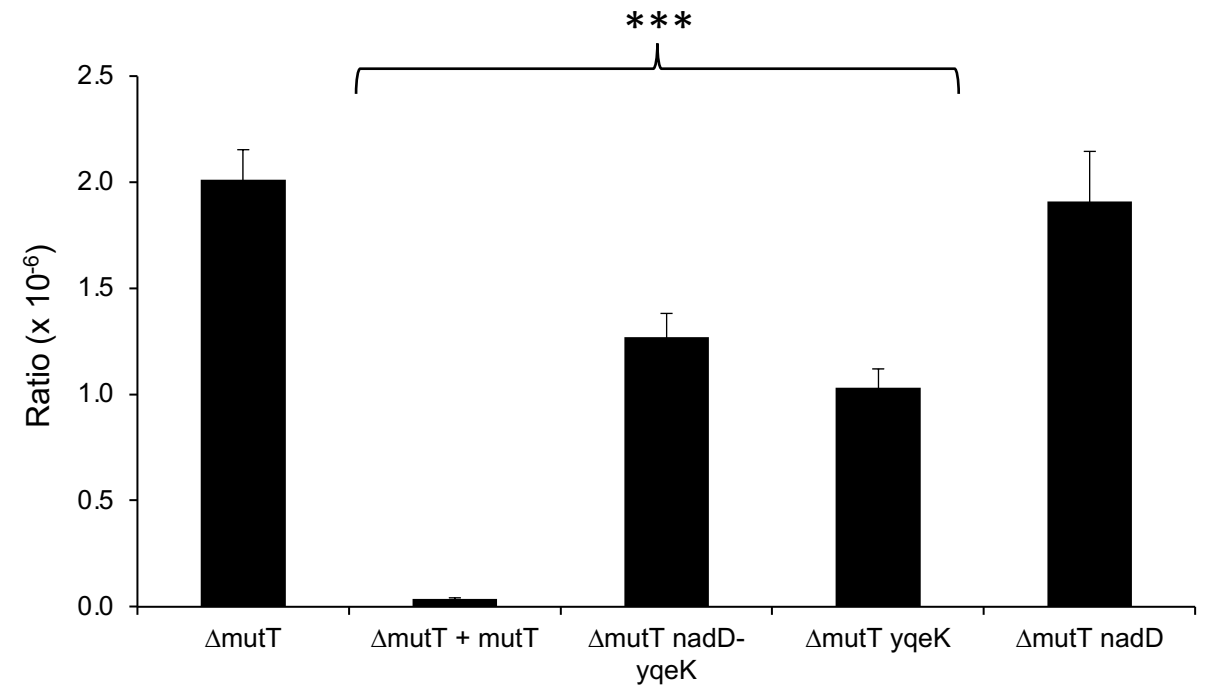

Figure 6

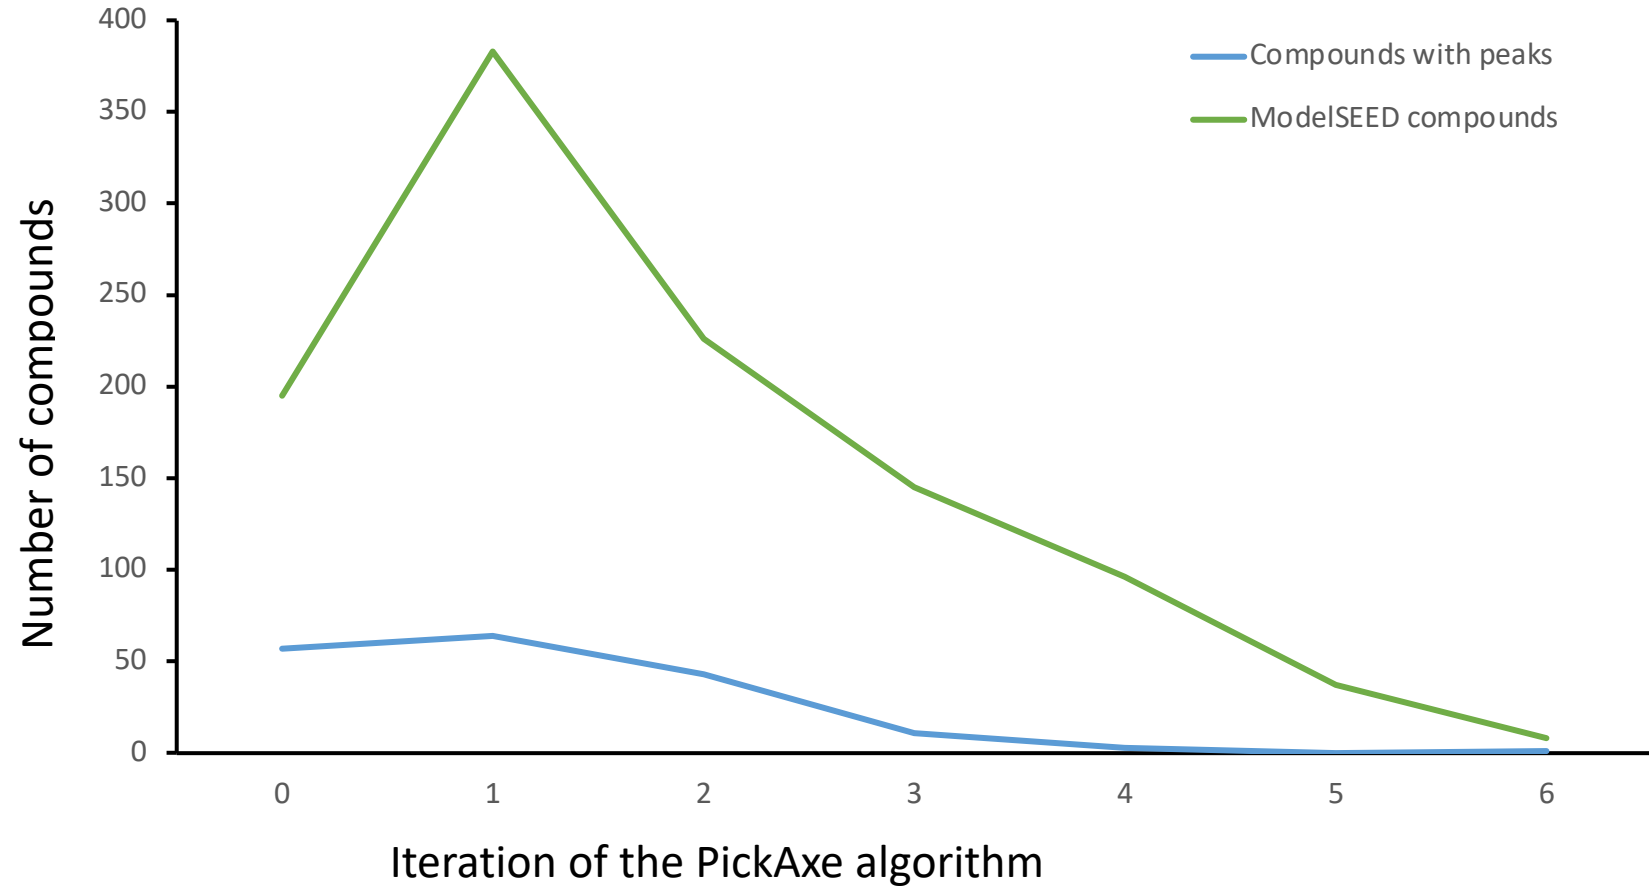

Figure 7

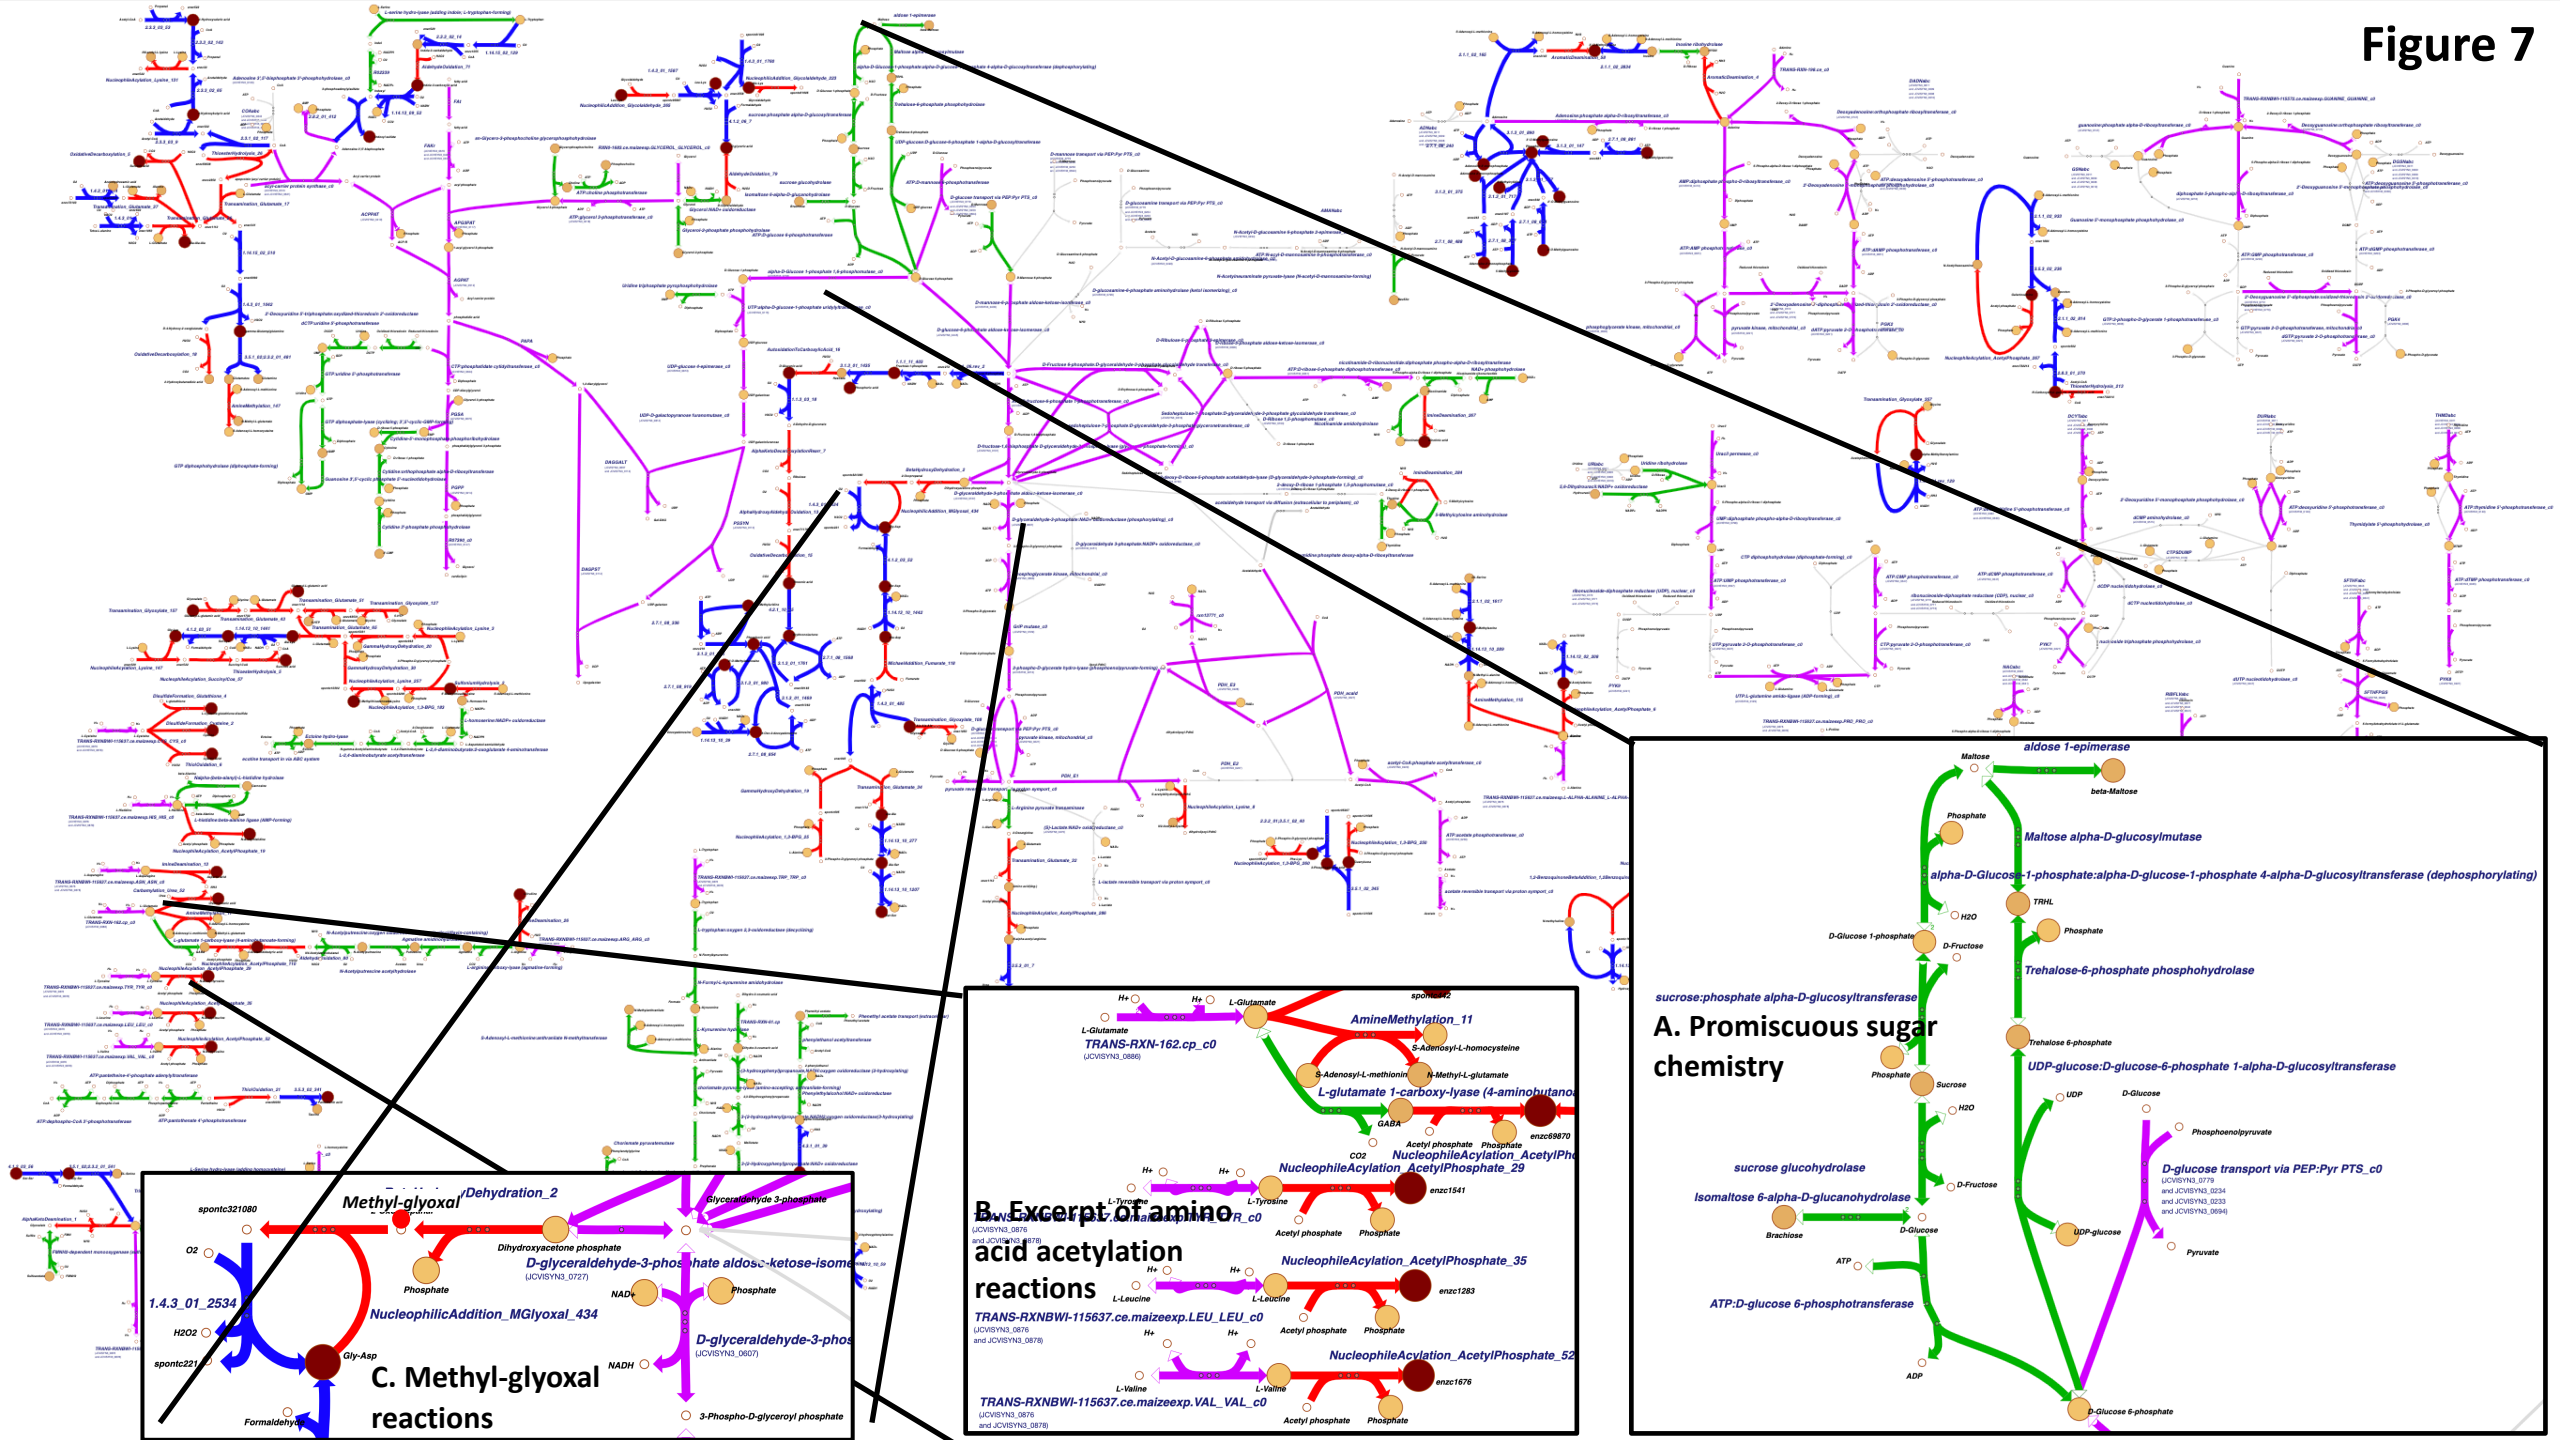





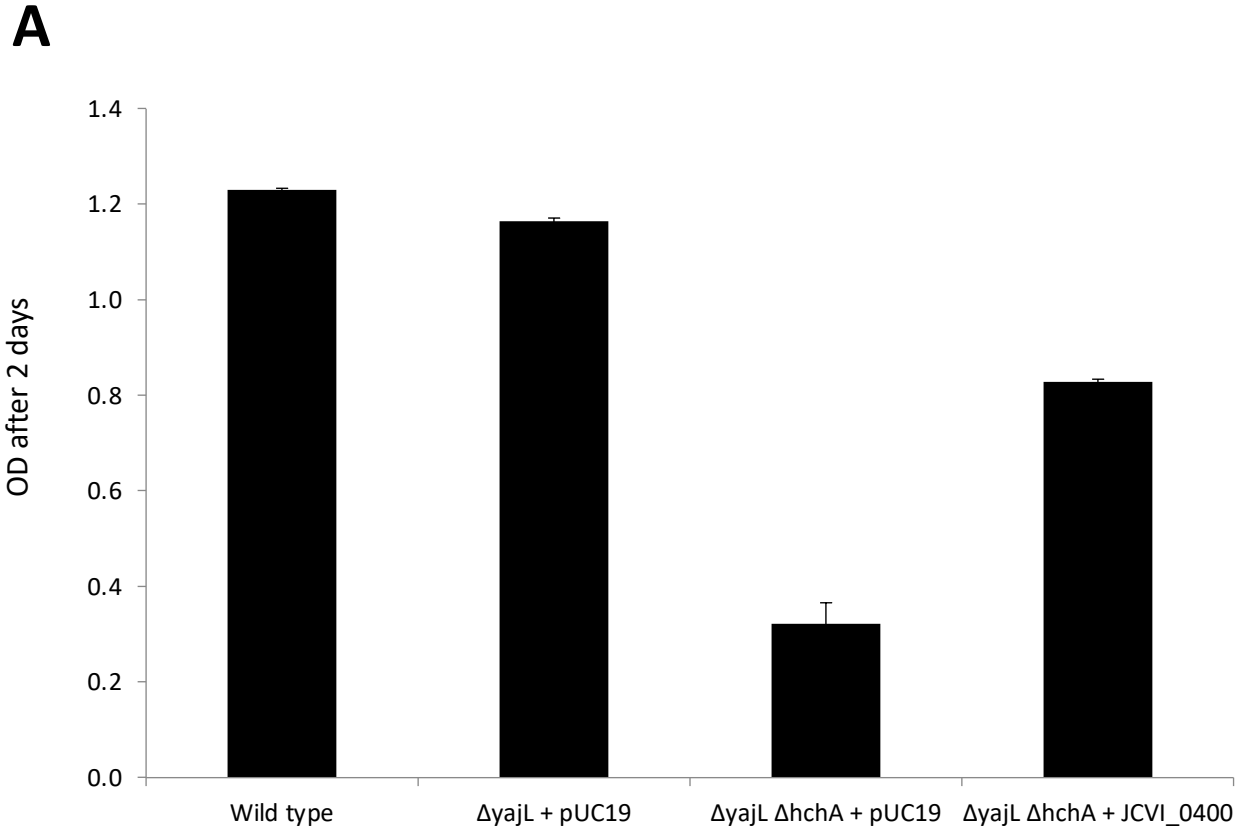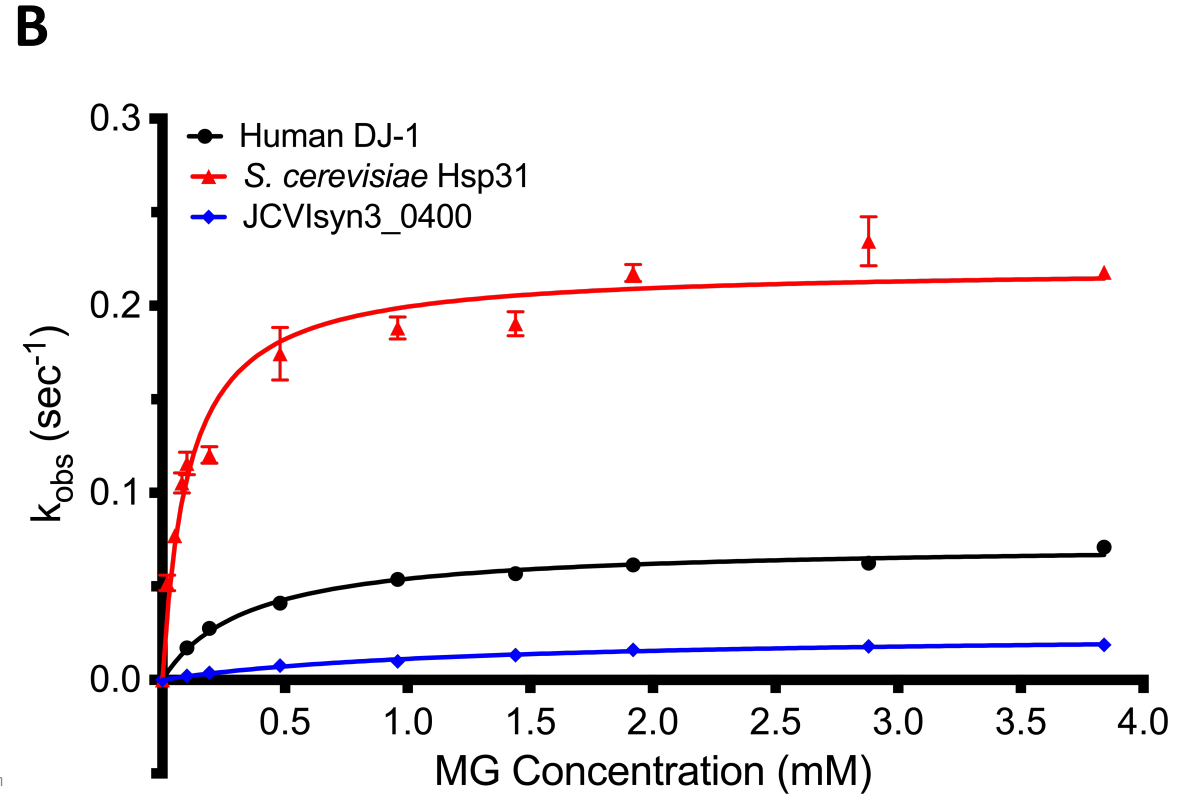

Source: https://www.biorxiv.org/content/10.1101/2021.12.01.470718v1.full.pdf
